# Supplementary material for: Thiazolylimines as novel ligand-systems for spin-crossover centred near room temperature
Source: Royal Society of Chemistry journal article supplement (doi:10.1039/c6dt02077a), 2016-01-01
Supplement: c6dt02077a1.pdf [file c6dt02077a1.pdf]

Supporting Information

## **Thiazolimines as Novel Ligand-System for Spin-Crossover Centred at Room Temperature**

N. Struch, N. Wagner, G. Schnakenburg, R. Weisbarth, S. Klos, J. Beck and A. Lützen

Kekulé-Institut für Organische Chemie und Biochemie, Rheinische Friedrich-Wilhelms-Universität Bonn.  
Gerhard-Domagk-Straße 1, 53121 Bonn. E-Mail: arne.luetzen@uni-bonn.de

Institut für Anorganische Chemie, Rheinische Friedrich-Wilhelms-Universität Bonn. Gerhard-Domagk-Straße 1,  
53121 Bonn.

|                                                                                                                                  |    |
|----------------------------------------------------------------------------------------------------------------------------------|----|
| Synthesis and characterisation.....                                                                                              | 3  |
| General .....                                                                                                                    | 3  |
| Spectra.....                                                                                                                     | 3  |
| DSC data on <b>1</b> [BF <sub>4</sub> ] <sub>2</sub> .....                                                                       | 17 |
| Magnetic susceptibility measurements .....                                                                                       | 18 |
| Crystal structure data .....                                                                                                     | 20 |
| Crystallographic data.....                                                                                                       | 20 |
| Crystallographic data .....                                                                                                      | 21 |
| <b>1</b> [BF <sub>4</sub> ] <sub>2</sub> .....                                                                                   | 21 |
| <b>1</b> [OTf] <sub>2</sub> .....                                                                                                | 22 |
| <b>1</b> [SbF <sub>6</sub> ] <sub>2</sub> .....                                                                                  | 23 |
| Analysis of coordination polyhedra via <i>Continuous Symmetry Measure</i> (CSM) and <i>Continuous Shape Measure</i> (CShM) ..... | 24 |
| Powder XRD data.....                                                                                                             | 25 |
| <b>1</b> [BF <sub>4</sub> ] <sub>2</sub> .....                                                                                   | 25 |
| <b>1</b> [OTf] <sub>2</sub> .....                                                                                                | 26 |
| <b>1</b> [SbF <sub>6</sub> ] <sub>2</sub> .....                                                                                  | 27 |

## Synthesis and characterisation

### General

All substances were purchased from Alfa Aesar, J. T. Baker, Sigma-Aldrich, or VWR Chemicals and used without further purification. NMR spectra were recorded at 400.1, 300.1 ( $^1\text{H}$ ) or 282.4 MHz ( $^{19}\text{F}$ ) with a Bruker Advance DPX 400 or DPX 300 spectrometer. Chemical shifts are given in ppm relative to residual solvent signals ( $^1\text{H}$ ). ESI mass spectra were recorded with a Fischer Scientific LTQ Orbitrap XL spectrometer. FT-IR spectra were recorded with a Thermo Nicolet 380 FT-IR spectrometer at room temperature. UV-Vis-spectra were recorded at room temperature using a Jena Analytic Specord 200 spectrometer, a 1 cm quartz cuvette and hplc grade solvents. Temperature-dependent magnetic susceptibility measurements were conducted by using a Quantum Design VSM vibrating sample magnetometer. All experiments were conducted using crystalline material or solutions thereof, respectively, as yielded by the procedures given below. Phase purity was proven by comparison of powder diffractograms with the respective calculated diffractograms calculated from singly crystal XRD-data.

### Spectra

#### $^1\text{H}$ -NMR of $\mathbf{1}[\text{Cl}]_2$

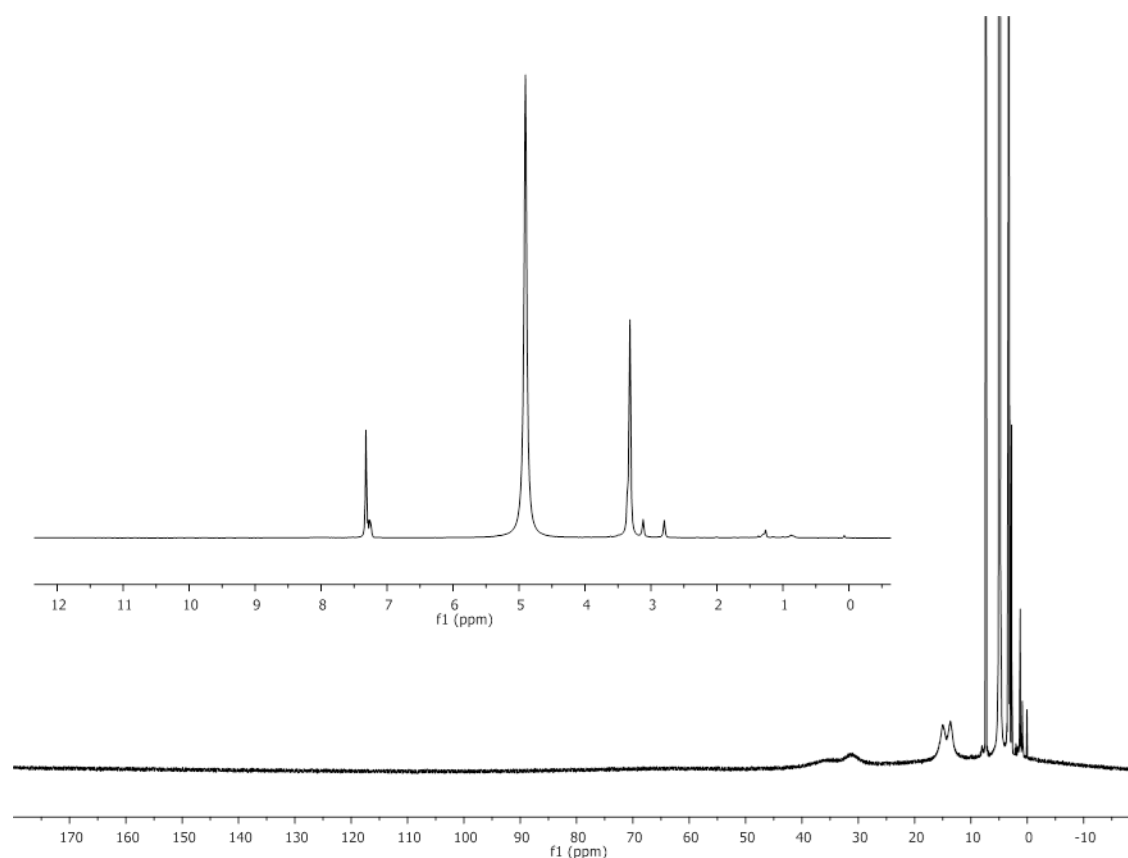

$^1\text{H}$ -NMR of  $\mathbf{1}[\text{Cl}]_2$  (400.1 MHz,  $\text{MeOH-}d_4$ , 293 K) inset showing the regular NMR regime, scaled to solvent residue signal. The multiplet around 7.3 ppm shows traces of chlorobenzene left from the workup procedure.

*Pos. ESI-HRMS of 1[Cl]<sub>2</sub>*

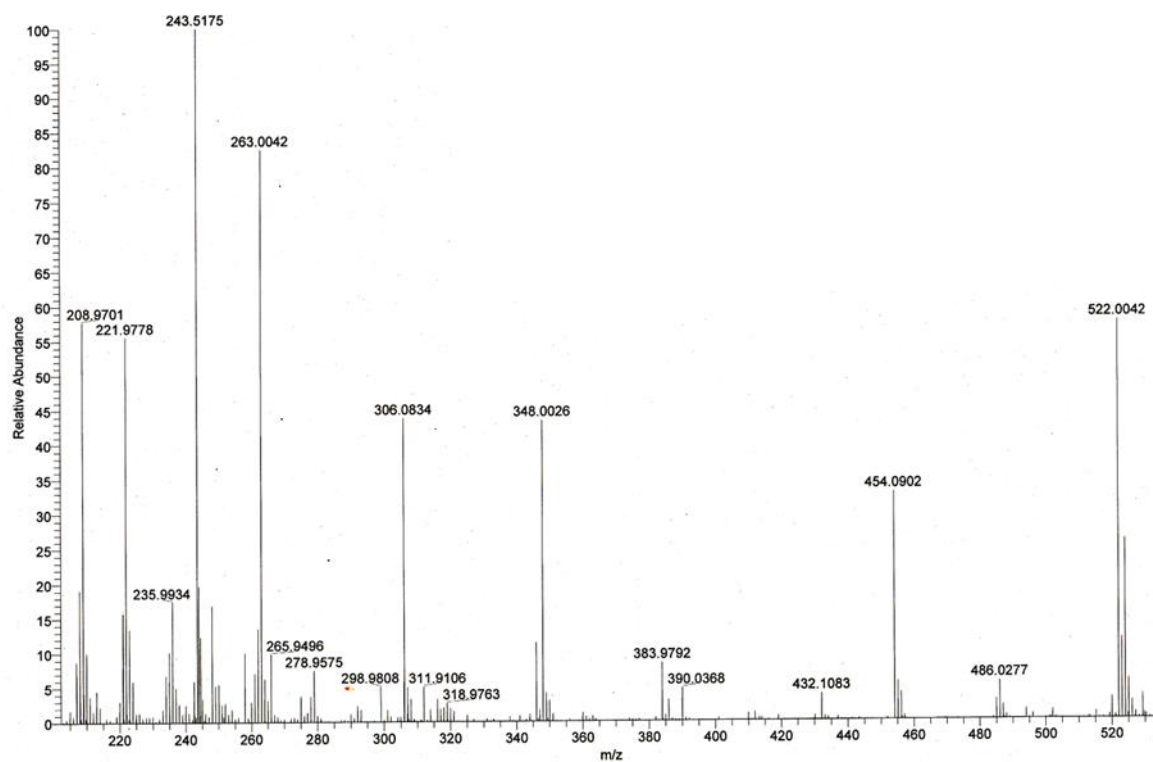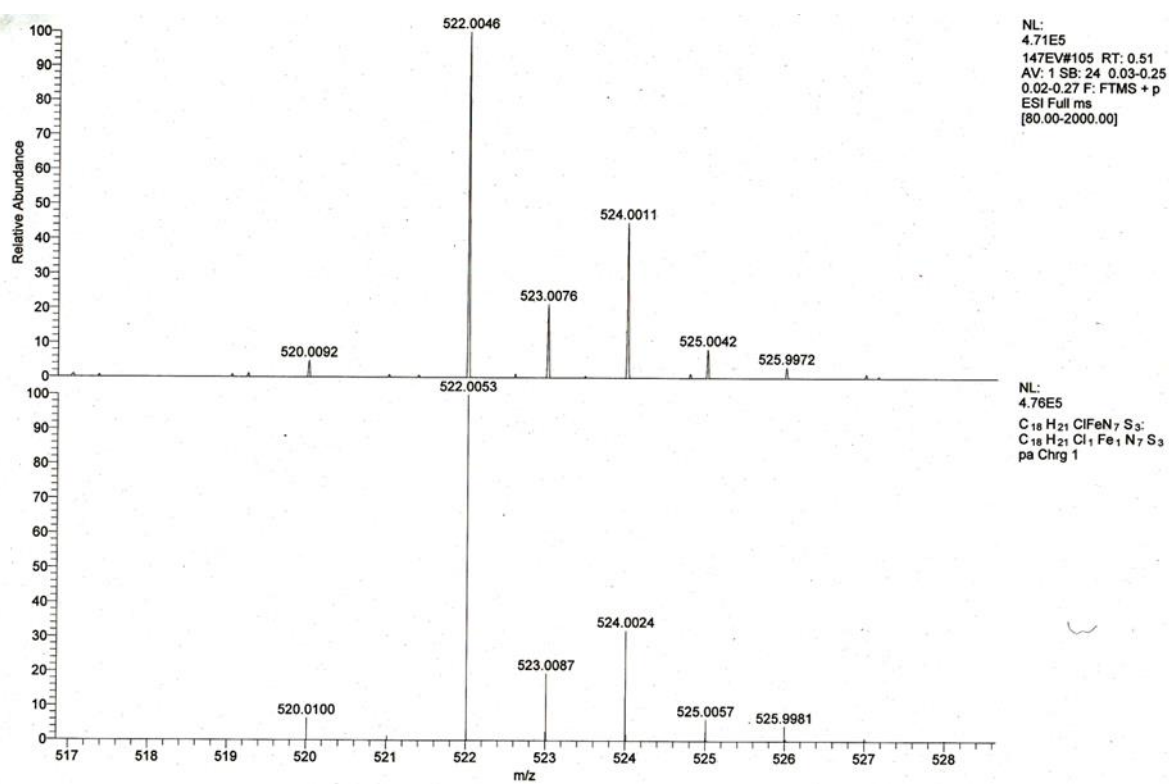

*FT-IR-Spectrum of **1**[Cl]<sub>2</sub>*

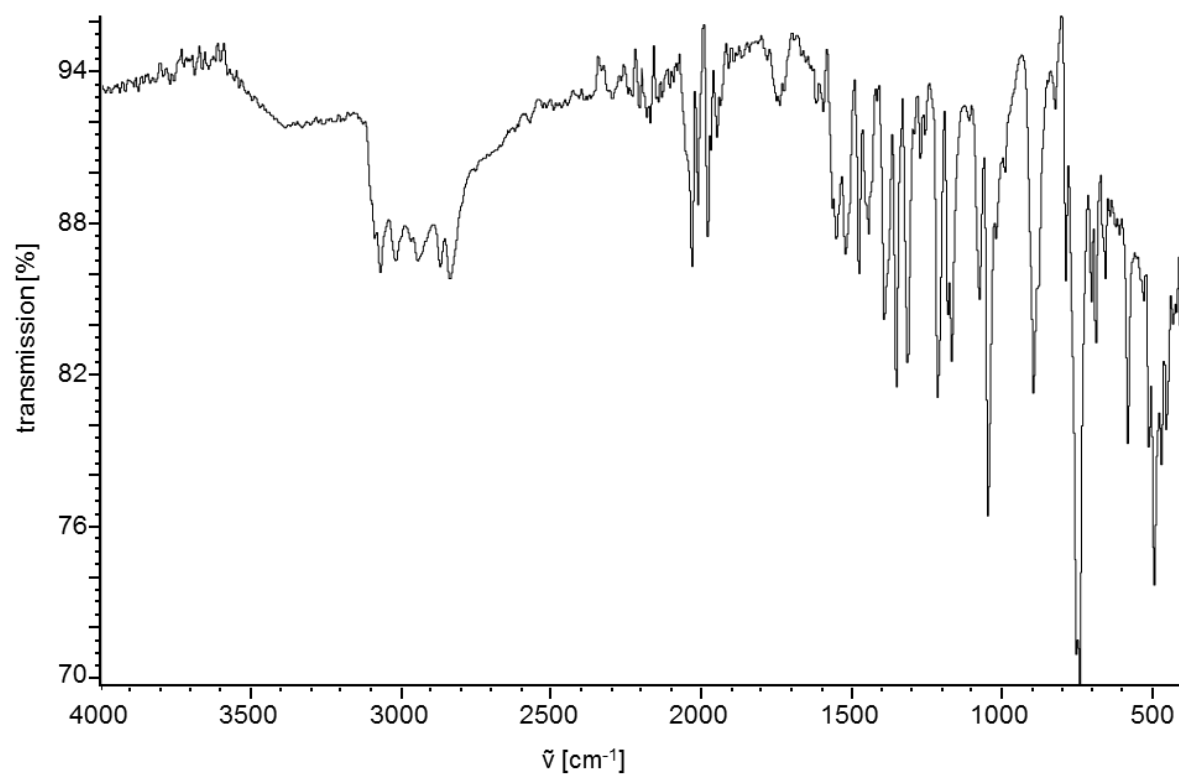

*UV/Vis spectrum of **1**[Cl]<sub>2</sub>*

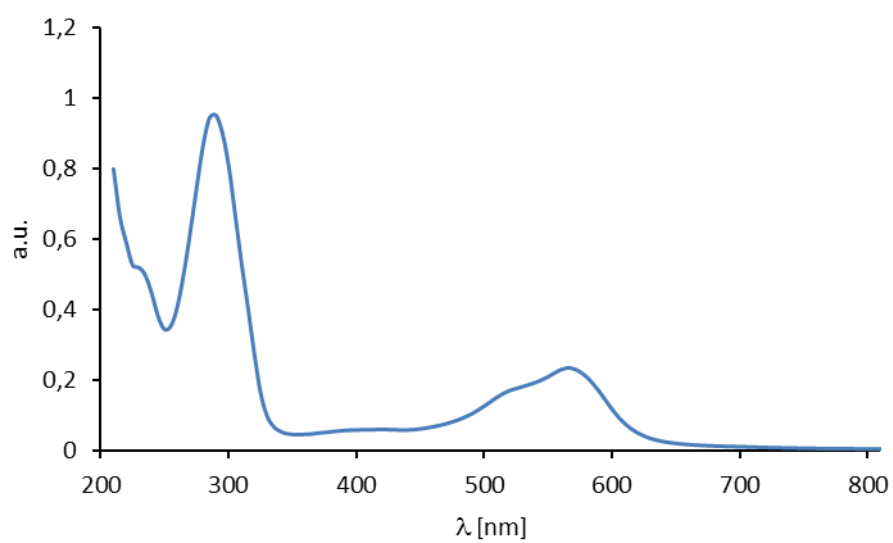

UV/Vis spectrum of **1**[Cl]<sub>2</sub> 50  $\mu$ M in MeCN.

*<sup>1</sup>H-NMR of 1[SbF<sub>6</sub>]<sub>2</sub>*

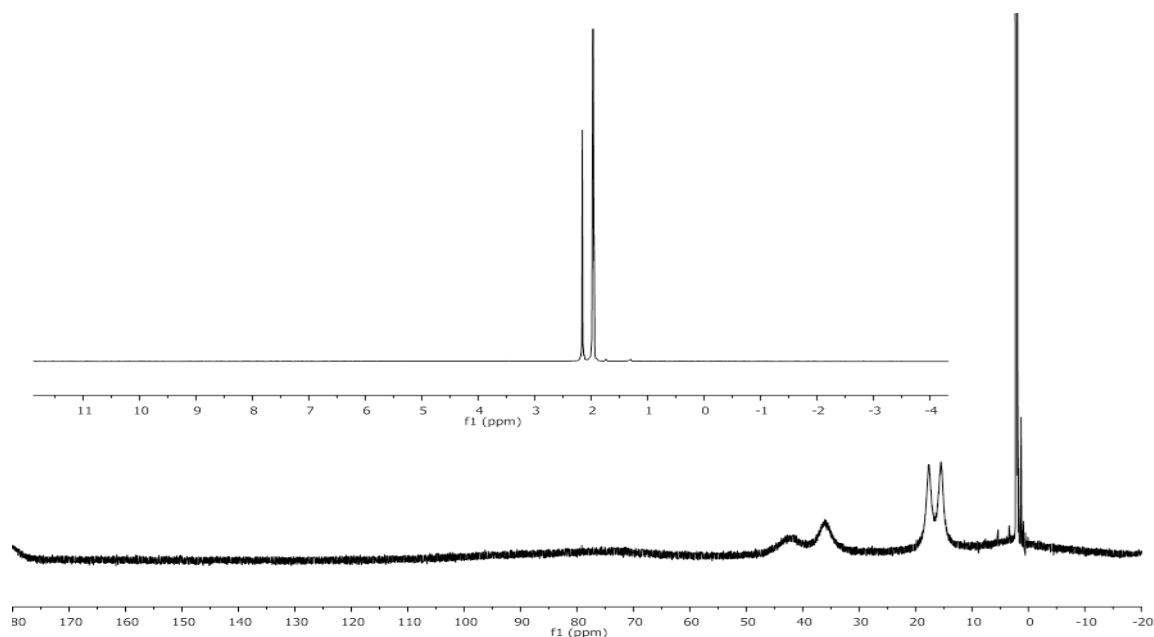

<sup>1</sup>H-NMR of 1[SbF<sub>6</sub>]<sub>2</sub> (400.1 MHz, MeCN-*d*<sub>3</sub>, 293 K)

*<sup>19</sup>F-NMR of 1[SbF<sub>6</sub>]<sub>2</sub>*

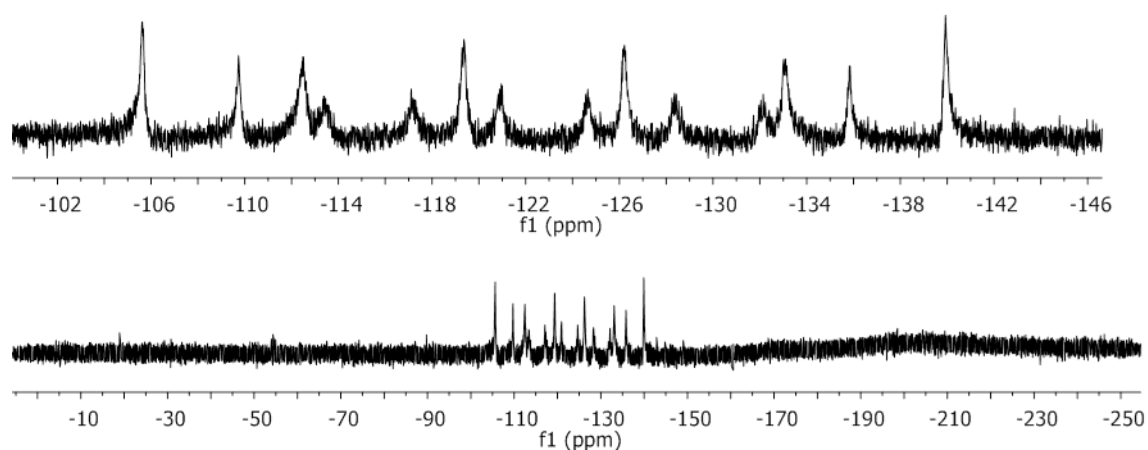

<sup>19</sup>F-NMR of a concentrated solution of 1[SbF<sub>6</sub>]<sub>2</sub> (282.4 MHz, MeCN-*d*<sub>3</sub>, 293 K). The complicated spectrum arises from two Sb isotopes <sup>121</sup>Sb (*S*=5/2) and <sup>125</sup>Sb (*S*=7/2) and matches the data reported in the literature.<sup>[1]</sup>

[1] R. G. Kidd and R. W. Matthews, *Inorg. Chem.* 1971, **11**, 1156.

Pos. ESI-HRMS of 1[SbF<sub>6</sub>]<sub>2</sub>

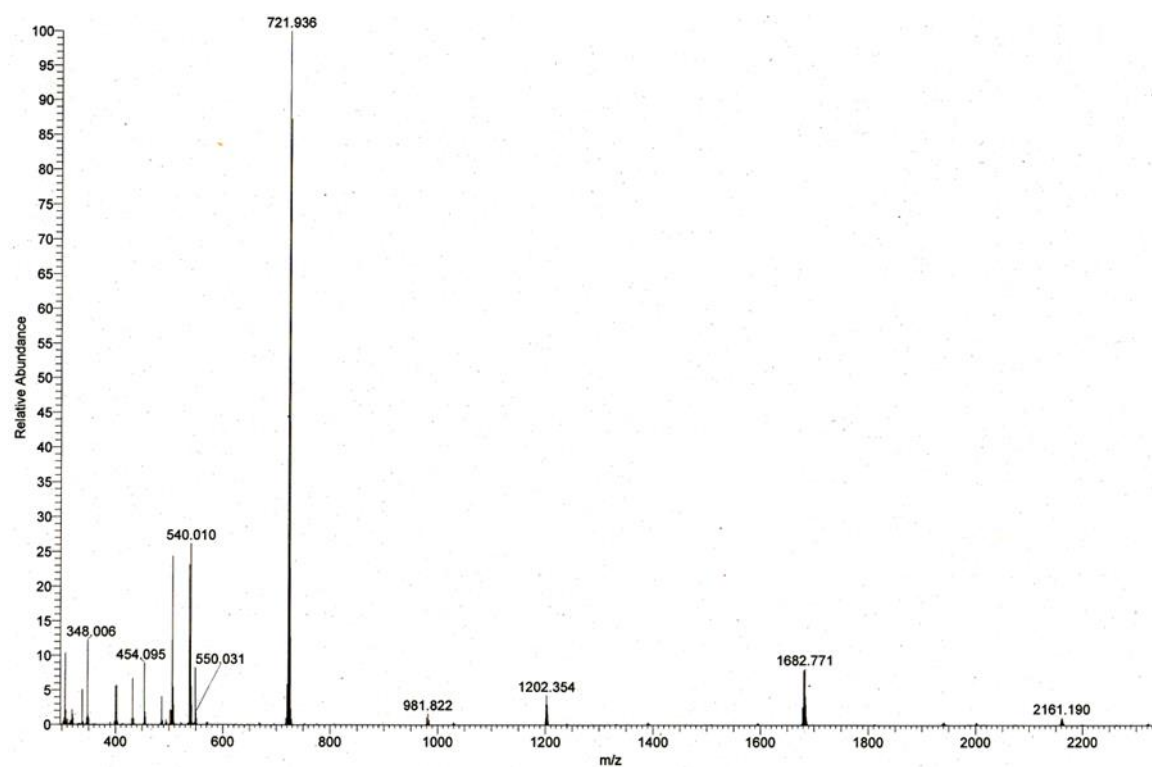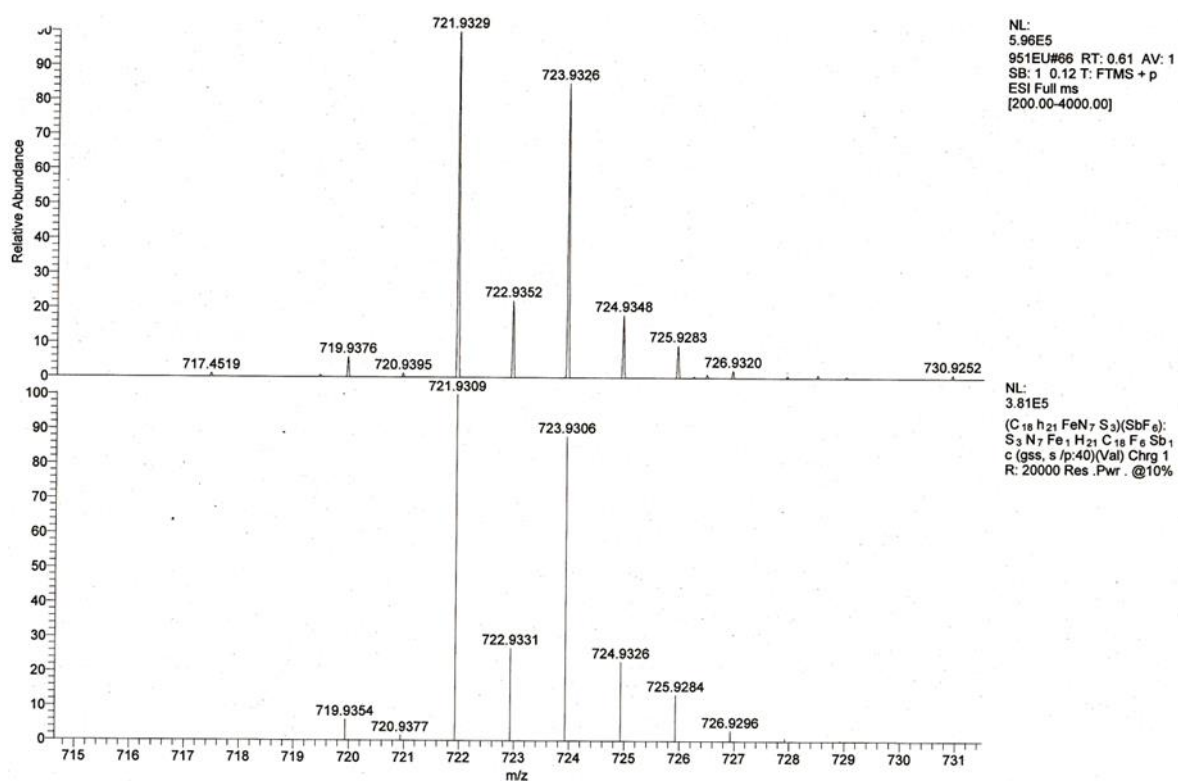

*FT-IR of  $1[\text{SbF}_6]_2$*

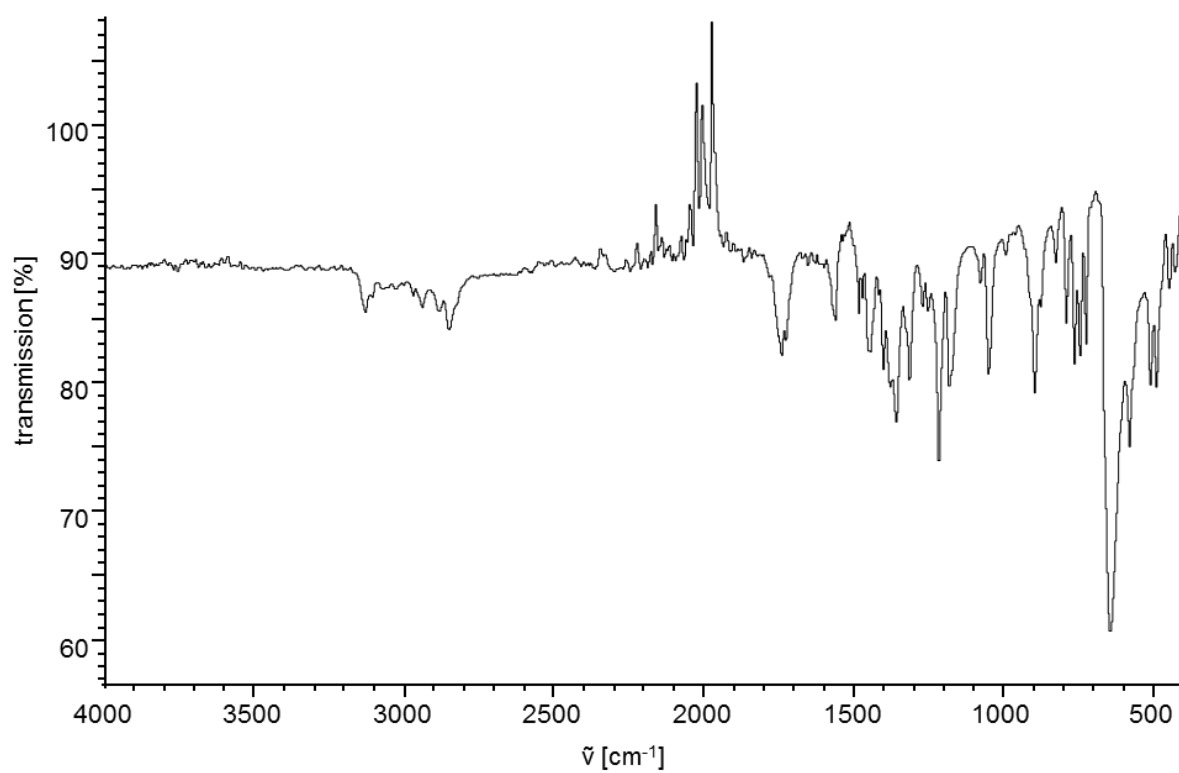

*UV/Vis of  $1[\text{SbF}_6]_2$*

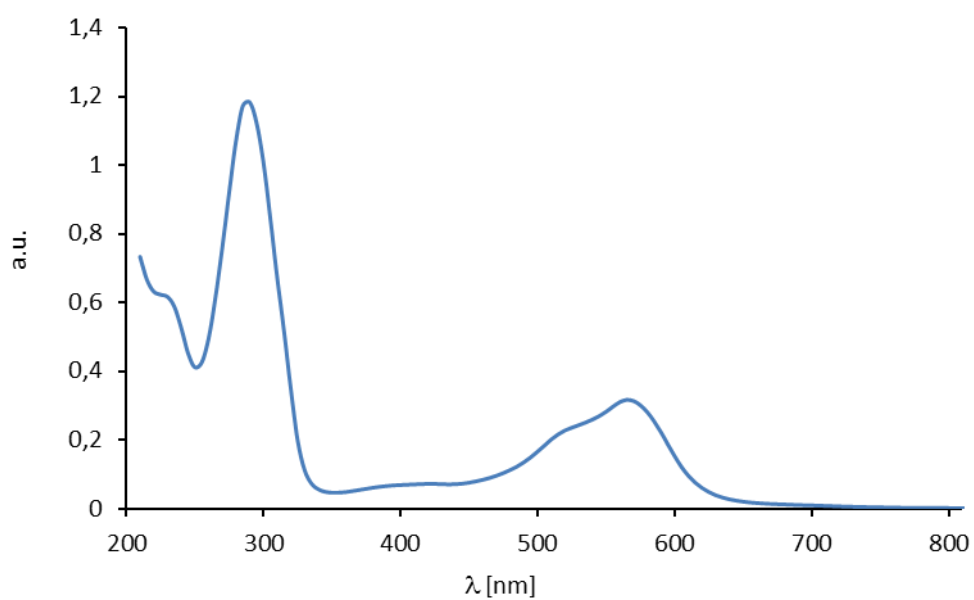

UV/Vis spectrum of  $1[\text{SbF}_6]_2$  (50  $\mu\text{M}$  in MeCN).

*<sup>1</sup>H-NMR of **1**[OTf]<sub>2</sub>*

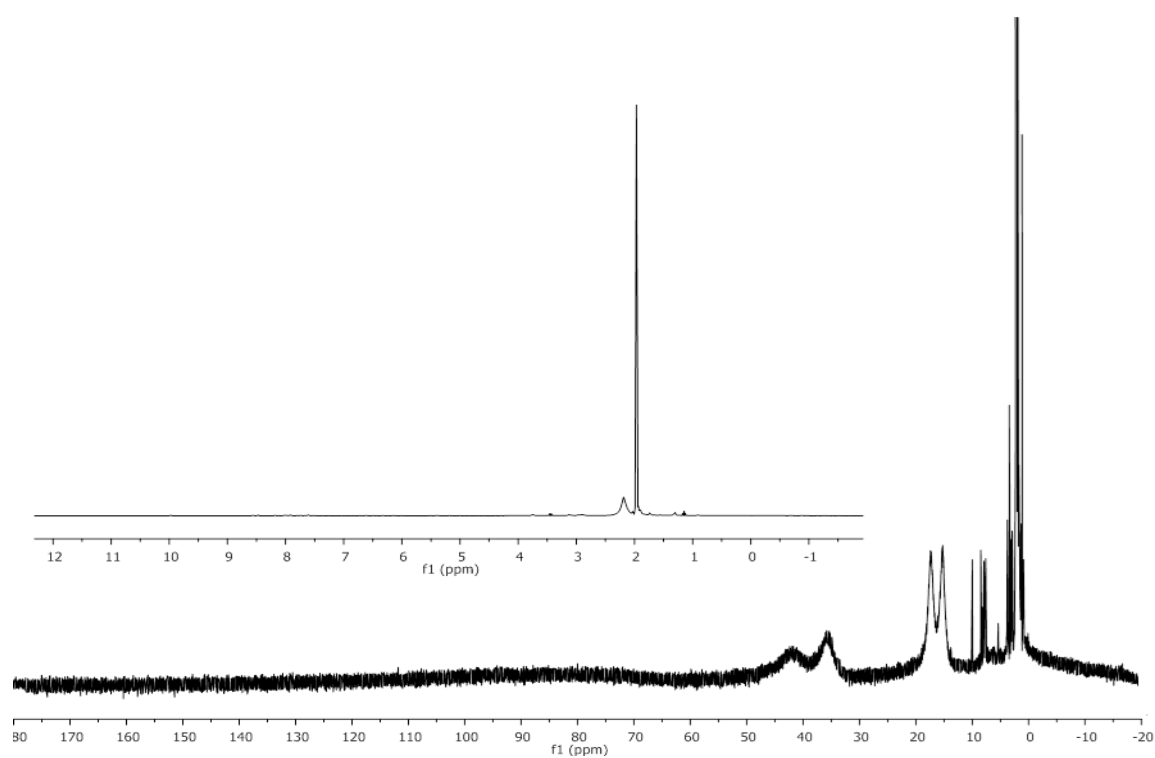

<sup>1</sup>H-NMR of **1**[OTf]<sub>2</sub> (400.1 MHz, MeCN-*d*<sub>3</sub>, 293 K)

*<sup>19</sup>F-NMR of **1**[OTf]<sub>2</sub>*

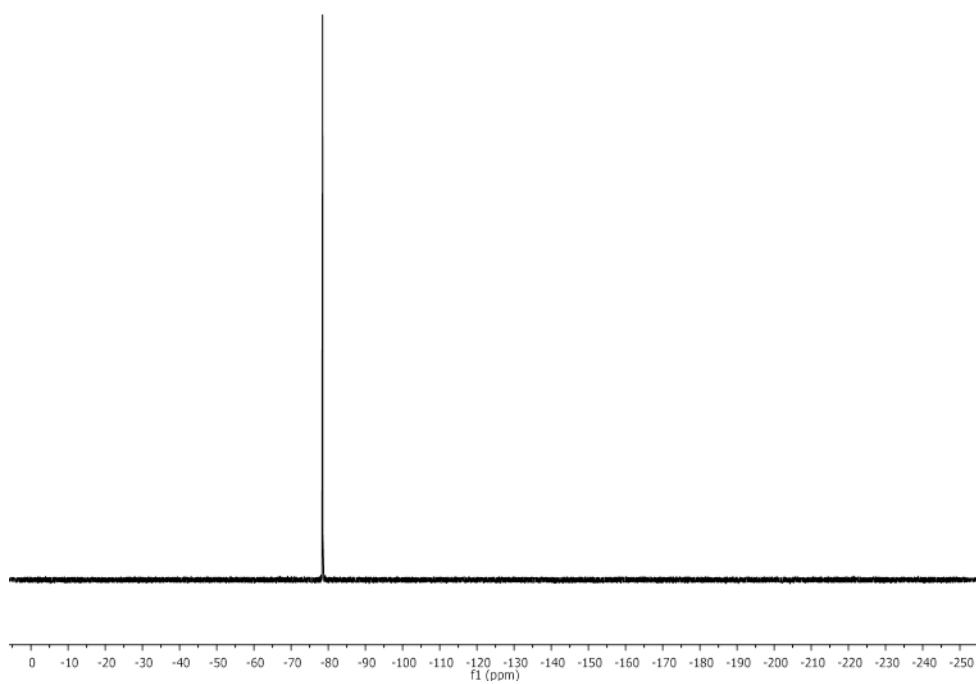

<sup>19</sup>F-NMR of **1**[OTf]<sub>2</sub> (282.4 MHz, MeCN-*d*<sub>3</sub>, 293 K).

Pos. ESI-HRMS of 1[OTf]<sub>2</sub>

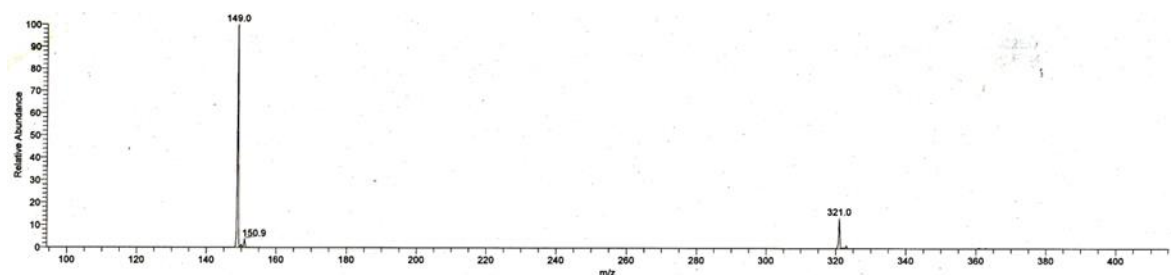

922EU #69-84 RT: 0.34-0.39 AV: 4 NL: 2.69E7  
F: FTMS + p ESI Full ms [80.00-2000.00]

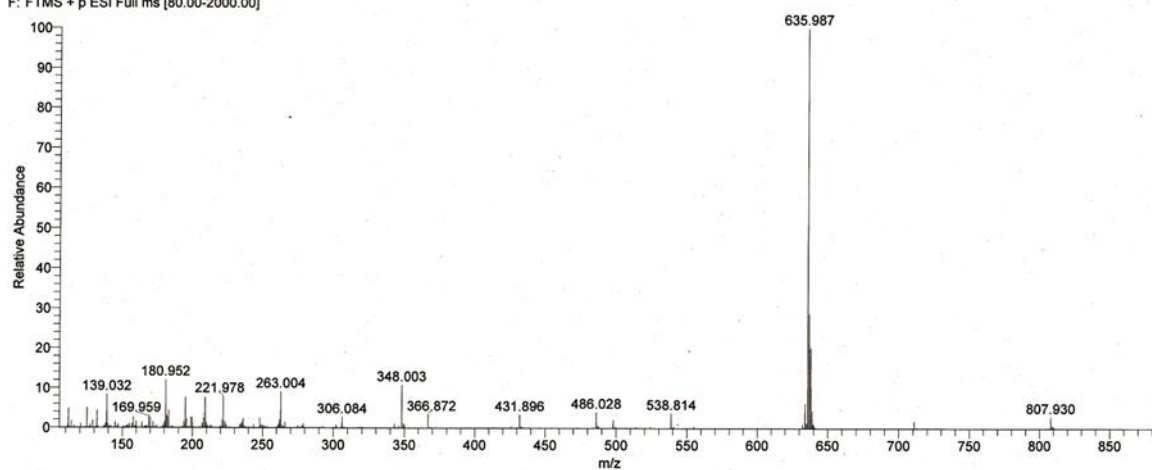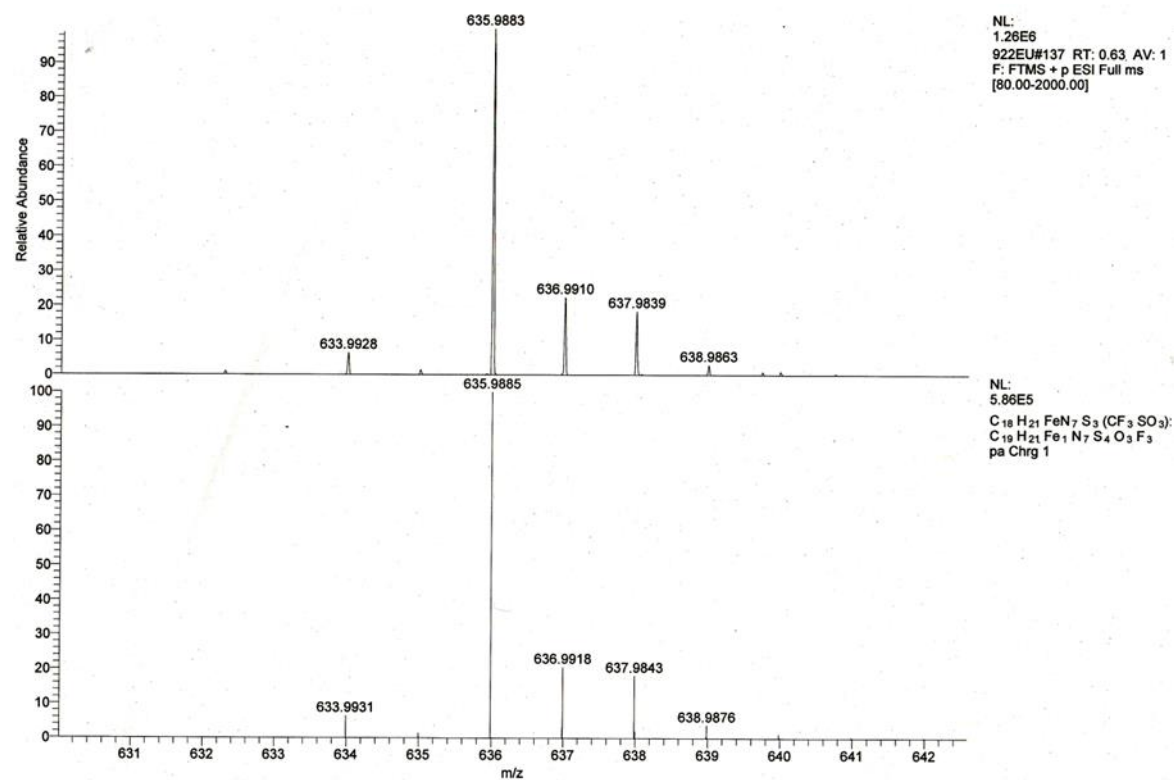

*FT-IR of  $1[OTf]_2$*

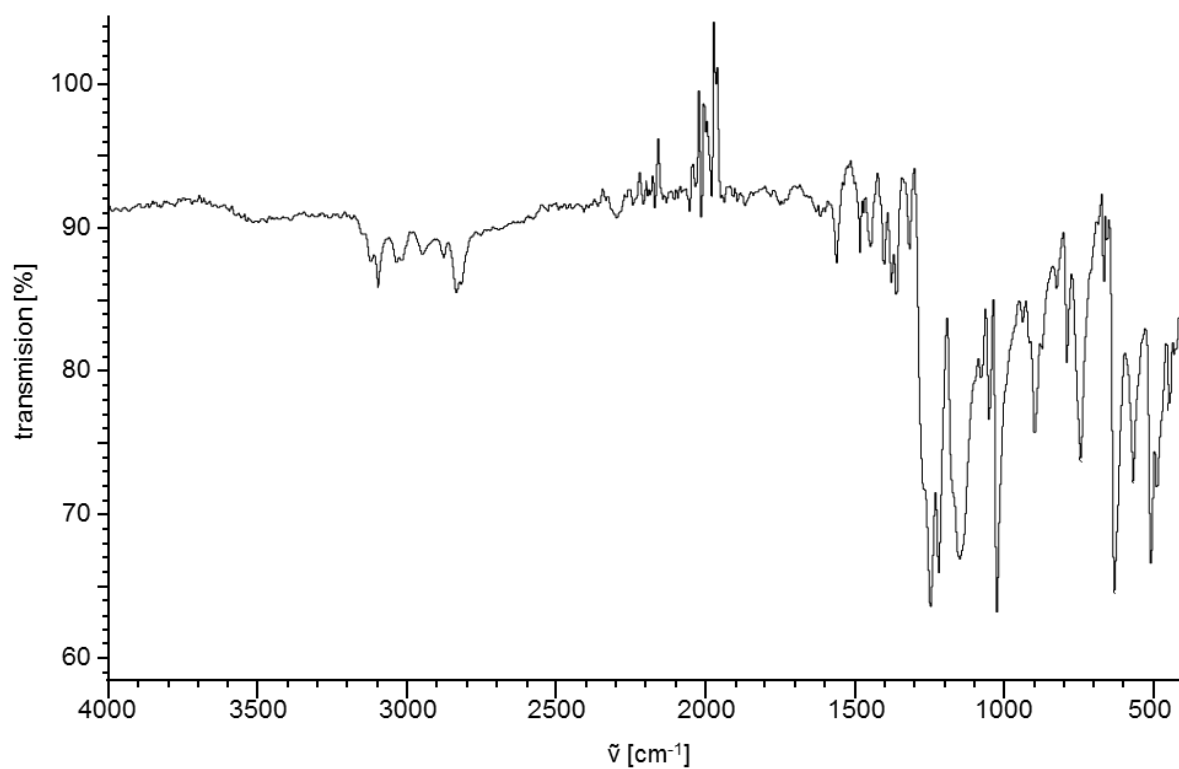

*UV/Vis of  $1[OTf]_2$*

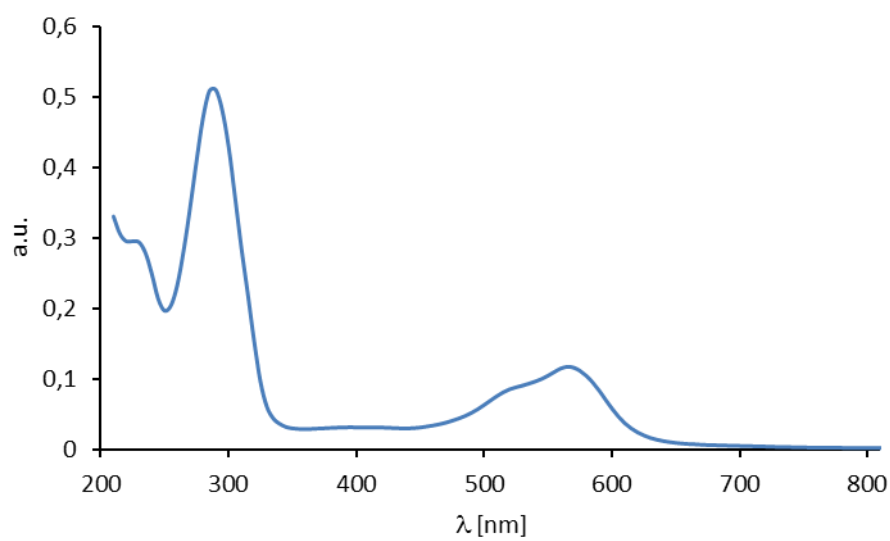

UV/Vis spectrum of  $1[OTf]_2$  50  $\mu\text{M}$  in MeCN.

$^1\text{H}$ -NMR of  $\mathbf{1}[\text{BF}_4]_2$

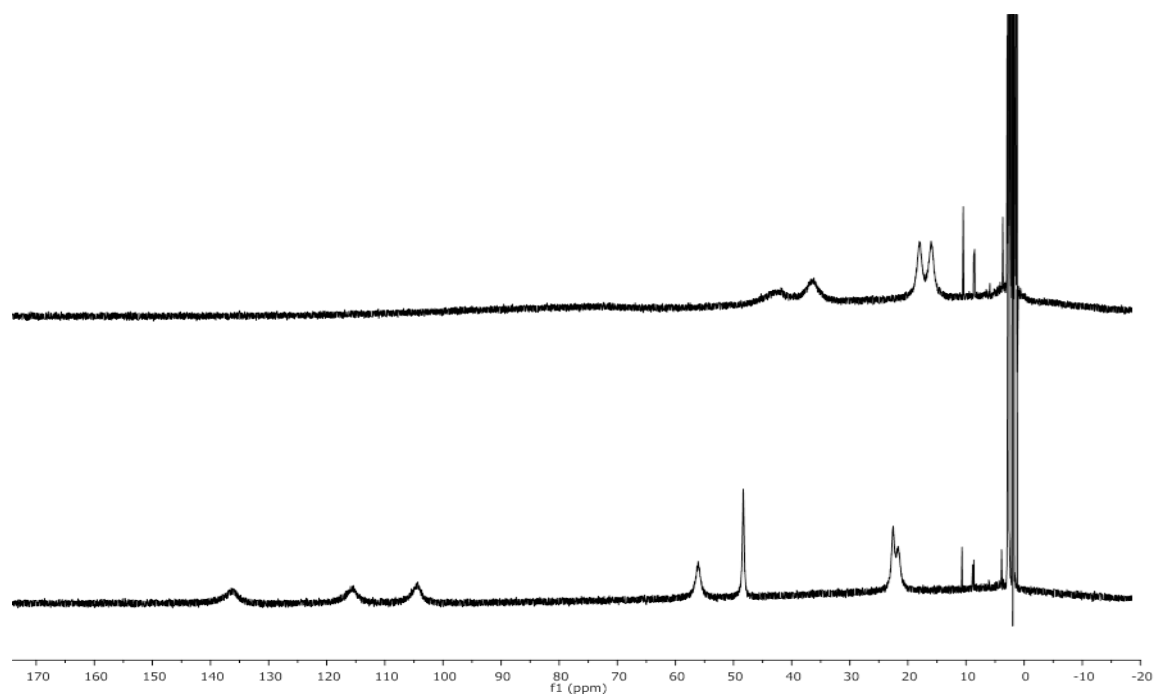

$^1\text{H}$ -NMR of  $\mathbf{1}[\text{BF}_4]_2$  (300.1 MHz,  $\text{MeCN-}d_3$ ): 293 K (top) and 340 K (bottom).

$^{19}\text{F}$ -NMR of  $\mathbf{1}[\text{BF}_4]_2$

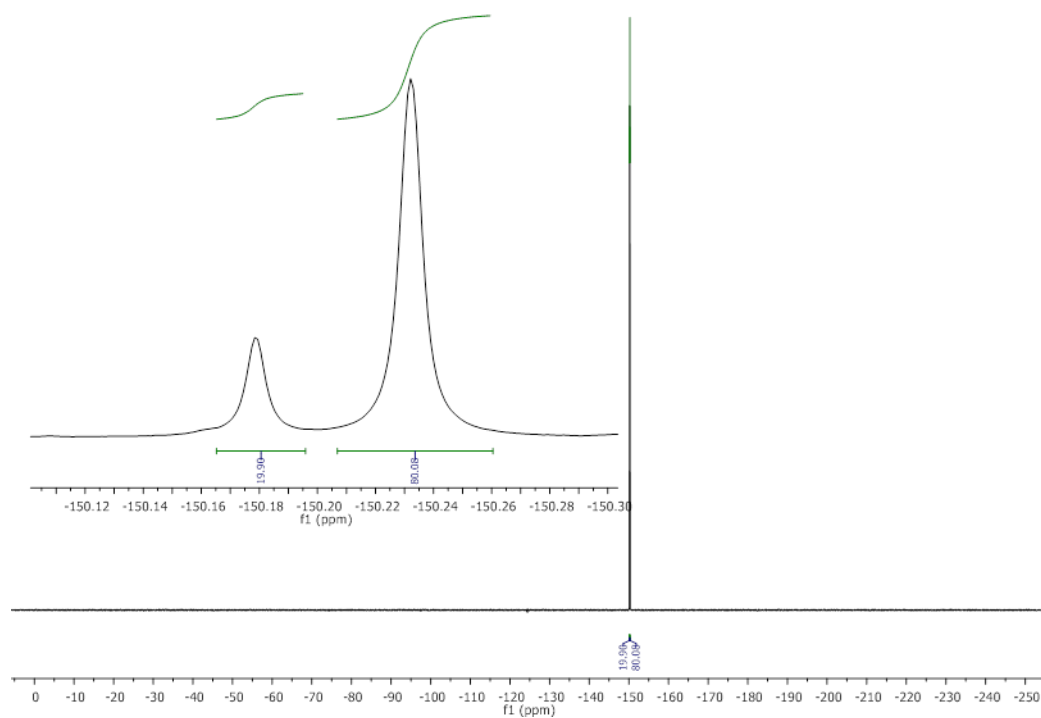

$^{19}\text{F}$ -NMR (282.4 MHz,  $\text{MeCN-}d_3$ , 293 K). Inset showing the typical boron isotope pattern.

## Temperature dependent NMR of $1[\text{BF}_4]_2$

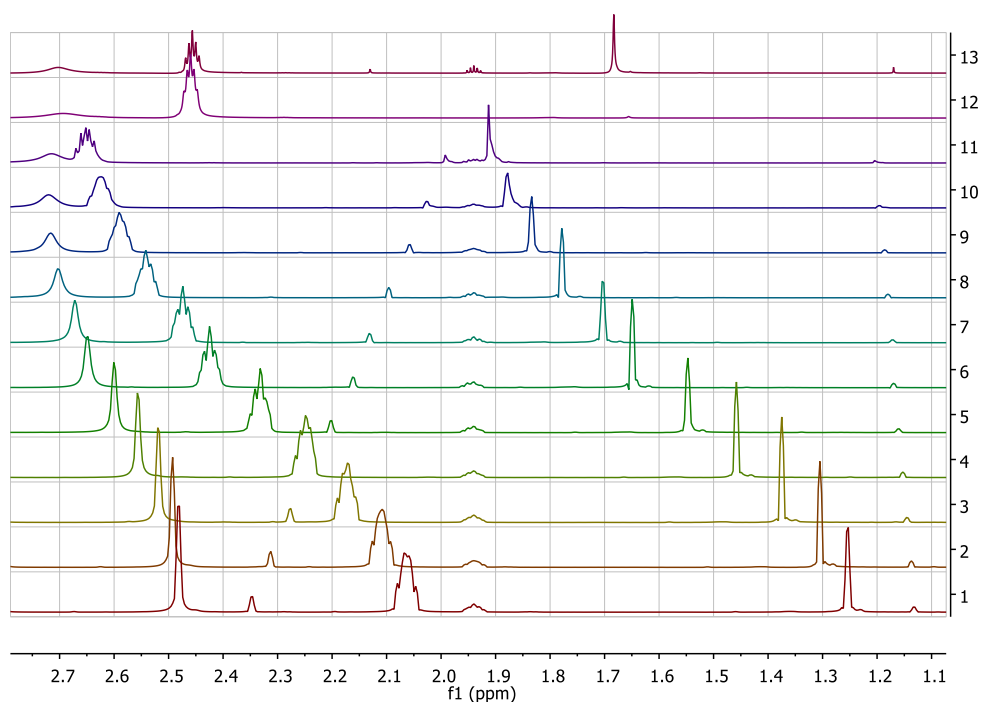

Temperature dependent  $^1\text{H}$ -NMR of  $1[\text{BF}_4]_2$  from 1.1 ppm to 2.8 ppm. From top to bottom: 400 MHz at 293K in  $\text{MeCN-}d_3$  with 2 mM  $t\text{BuOH}$  with coaxial insert 2 mM  $t\text{BuOH}$  in  $\text{MeCN-}d_3$ , 400 MHz at 293 K in  $\text{MeCN-}d_3$  without  $t\text{BuOH}$  and insert, then 340 K to 240 K in 10 K steps 300 MHz 200mM  $1[\text{BF}_4]_2$  with 2 mM  $t\text{BuOH}$  and coaxial insert with 2 mM  $t\text{BuOH}$  in  $\text{MeCN-}d_3$ .

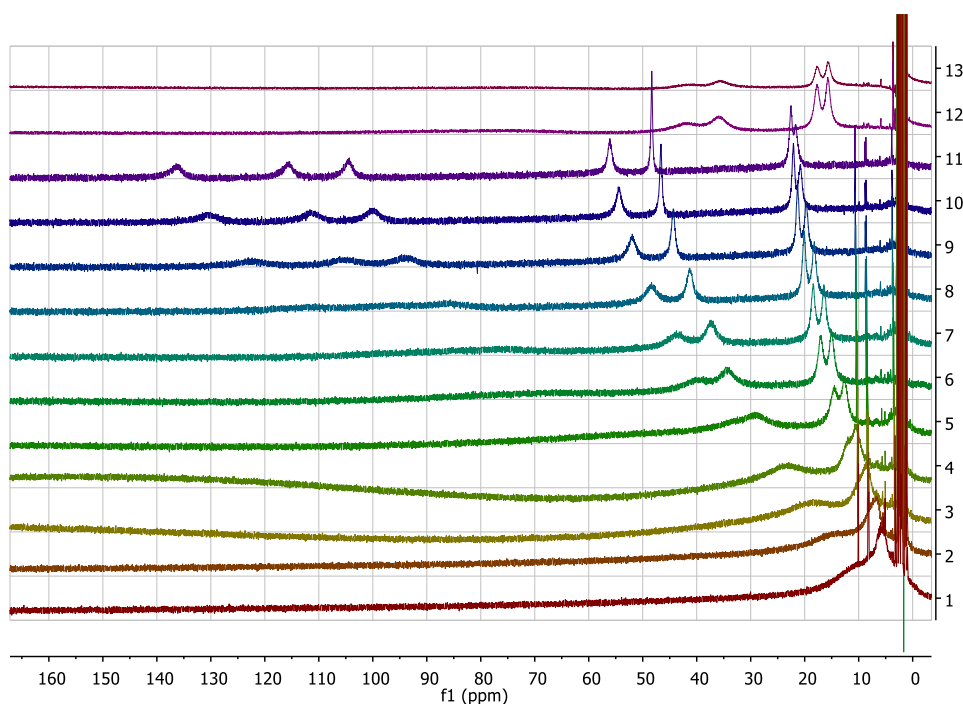

Temperature dependent  $^1\text{H}$ -NMR of  $1[\text{BF}_4]_2$  from -10 to 160 ppm. From top to bottom: 400 MHz at 293K in  $\text{MeCN-}d_3$  with 2 mM  $t\text{BuOH}$  with coaxial insert 2 mM  $t\text{BuOH}$  in  $\text{MeCN-}d_3$ , 400 MHz at 293 K in  $\text{MeCN-}d_3$  without  $t\text{BuOH}$  and insert, then 340 K to 240 K in 10 K steps 300 MHz 200 mM  $1[\text{BF}_4]_2$  with 2 mM  $t\text{BuOH}$  and coaxial insert with 2 mM  $t\text{BuOH}$  in  $\text{MeCN-}d_3$ .

Pos. ESI-HRMS of 1[BF<sub>4</sub>]<sub>2</sub>

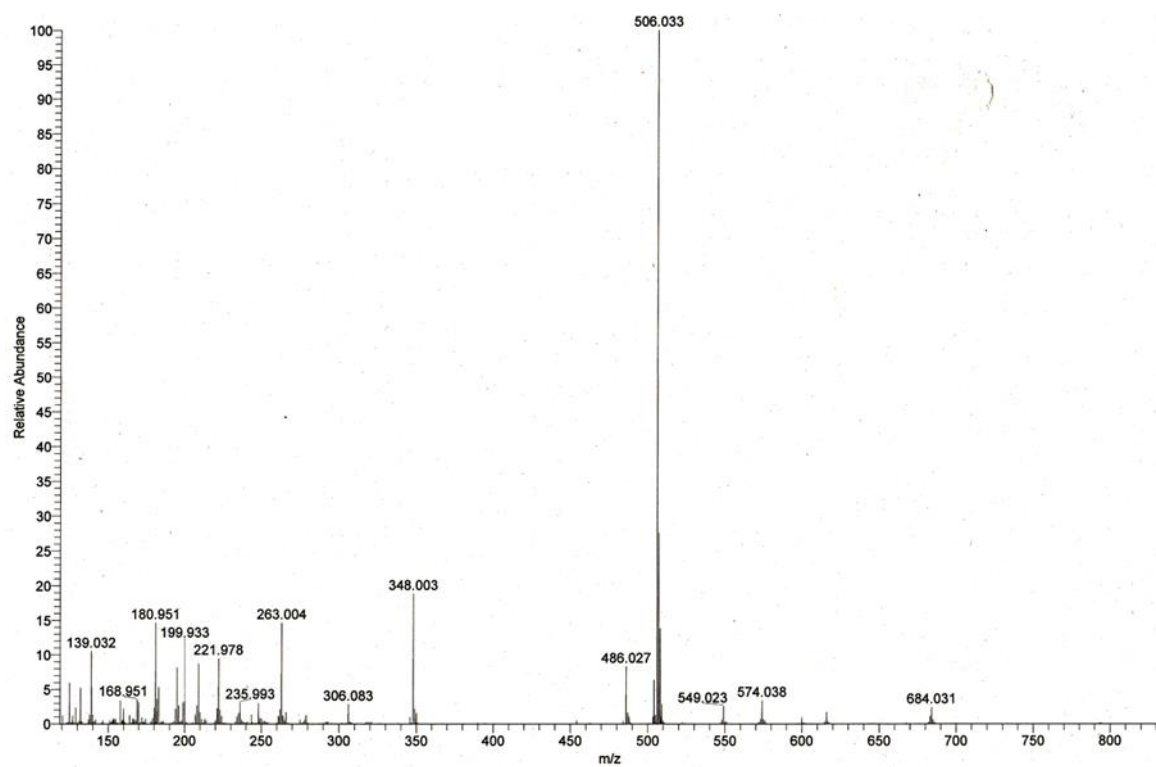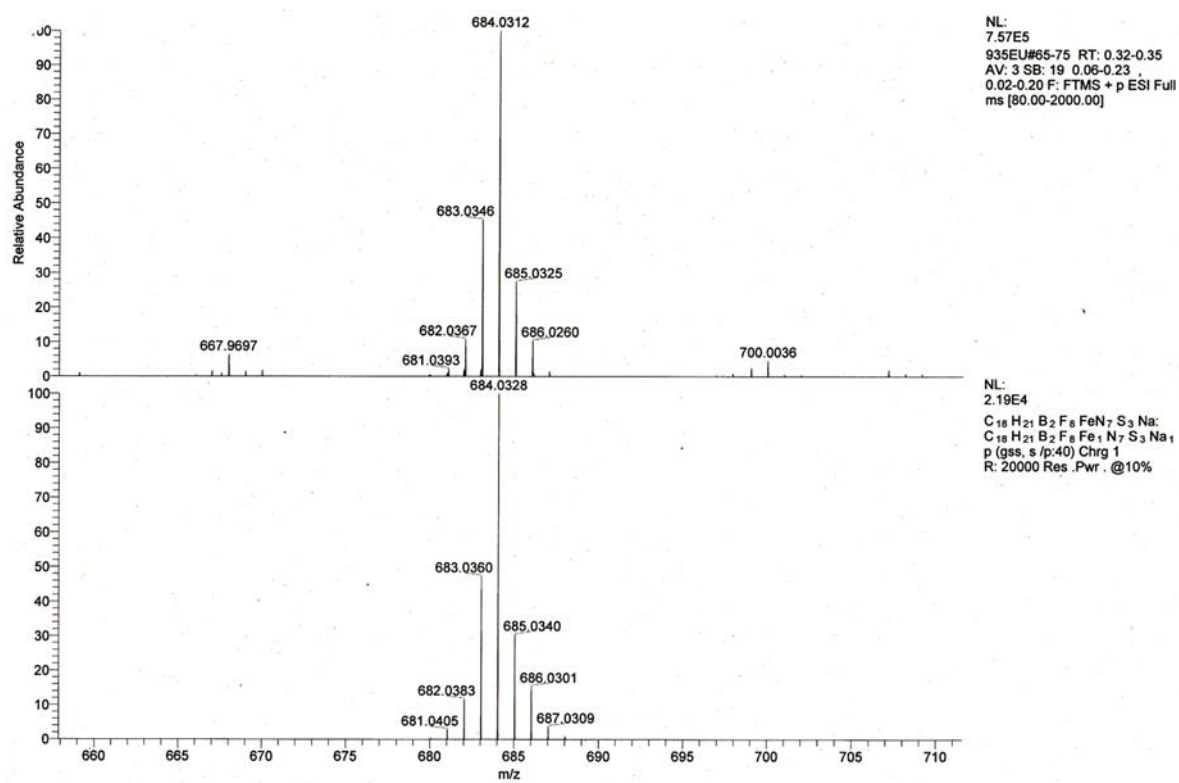

*FT-IR of  $1[BF_4]_2$*

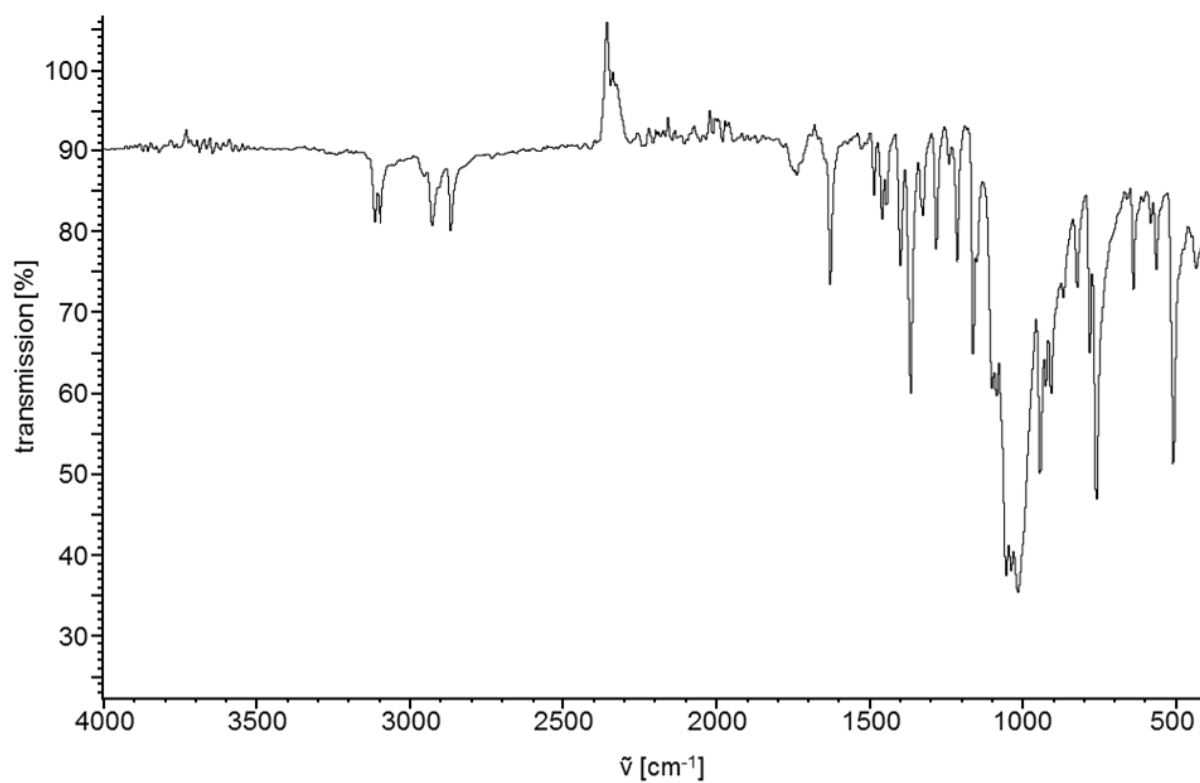

*UV/Vis of  $1[BF_4]_2$*

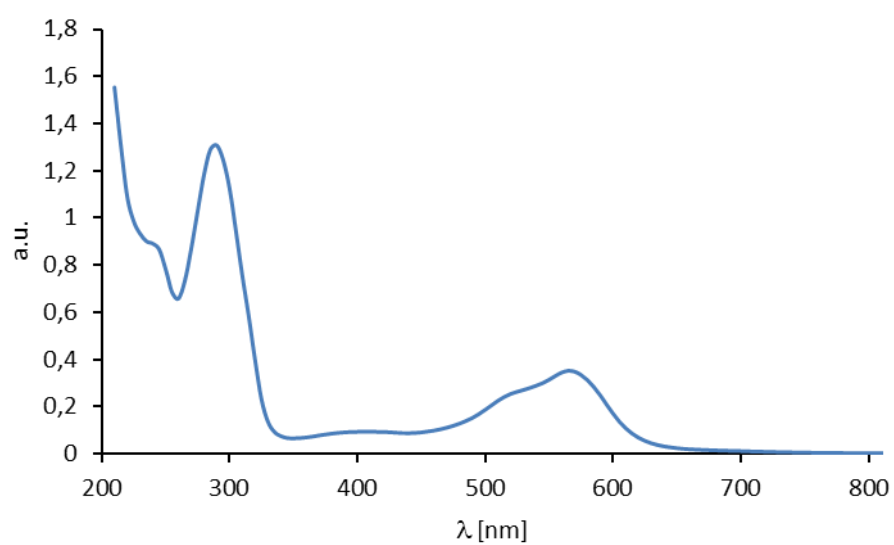

UV/Vis spectrum of  $1[BF_4]_2$  50  $\mu M$  in MeCN.

### Comparison of UV/Vis spectra

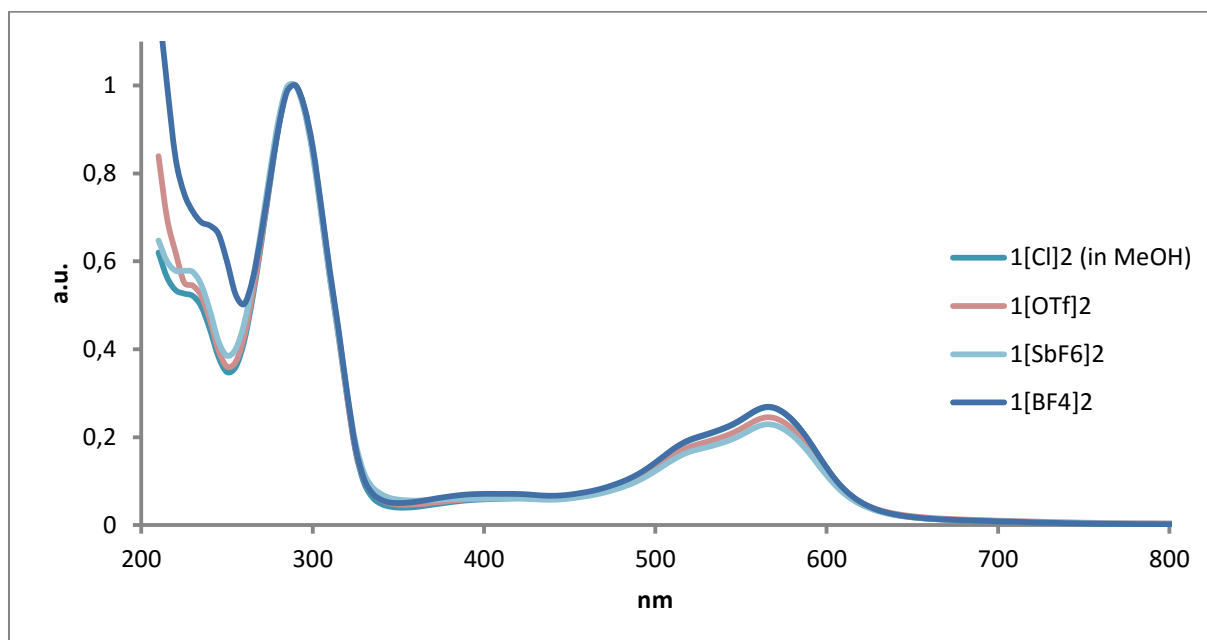

Normalized UV/Vis spectra of **1**[Cl]<sub>2</sub> 50 μM in MeOH, **1**[OTf]<sub>2</sub> 50 μM in MeCN, **1**[SbF<sub>6</sub>]<sub>2</sub> 50 μM in MeCN, and **1**[BF<sub>4</sub>]<sub>2</sub> 50 μM in MeCN.

## DSC data on 1[BF<sub>4</sub>]<sub>2</sub>

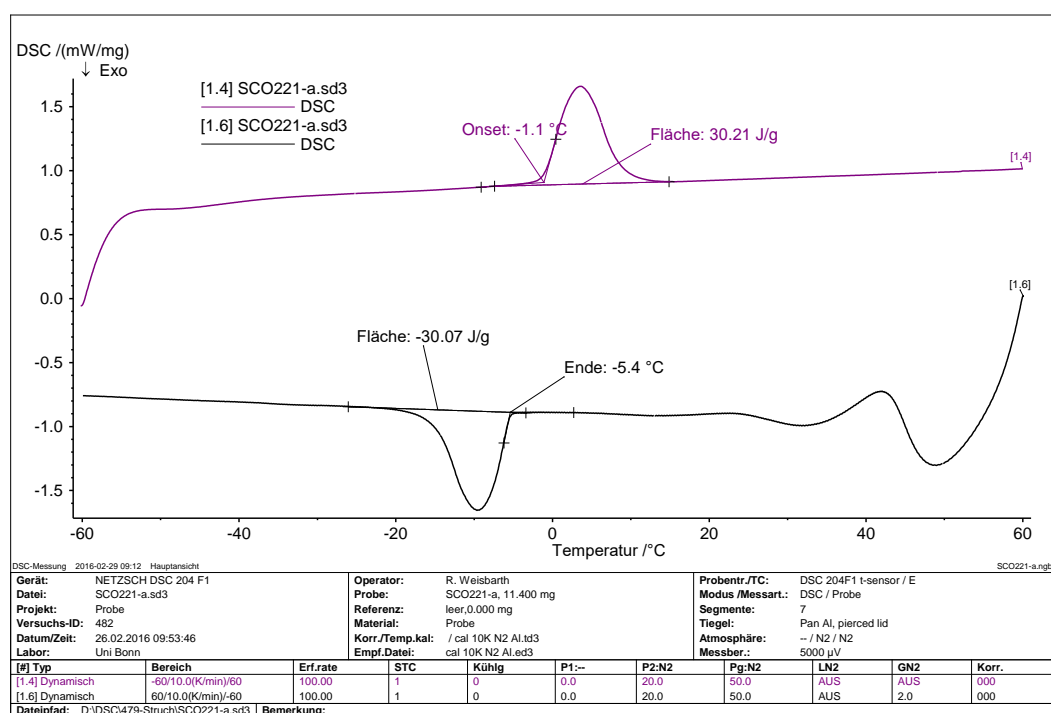

Thermal analyses were carried out on a Netzsch DSC 204 F1 equipped with a cooling device CC 200 F1 which allowed cooling with liquid nitrogen. 11.400 mg of the sample were weighed into aluminum crucibles, cold sealed and cooled from 60 °C to -60 °C and successively heated from -60 °C to 60 °C. The heating and cooling rates were 10 K/min. During the measurements, the oven was flushed with 20 ml/min nitrogen as protective gas and 50 ml/min nitrogen as purge gas. The given temperatures correspond to the onset of a thermal effect.

## Magnetic susceptibility measurements

Crystalline samples of  $1[\text{BF}_4]_2$  (9.1727 mg),  $1[\text{OTf}]_2$  (10.9846 mg),  $1[\text{SbF}_6]_2$  (18.5599 mg) were used as obtained by the given synthetic procedures. They were slightly pressed to cylindrical shape and investigated in the temperature range from 1.9 K to 400 K at a vibrating frequency of 40 Hz in a magnetic field of 5000 Oe. A correction to the diamagnetic moment of the container was applied. The moment of the empty container was determined experimentally over the whole temperature range and susceptibility data of both the sample and the container were accordingly corrected.

Hysteresis loop in  $1[\text{BF}_4]_2$  was investigated by variable temperature susceptibility measurements in a field of 5000 Oe, 10000 Oe and 20000 Oe at a scan rate of  $1 \text{ K min}^{-1}$ . It was also investigated at scan rates of  $1 \text{ K min}^{-1}$  and  $0.25 \text{ K min}^{-1}$  at 5000 Oe and  $0.5 \text{ K min}^{-1}$  at 20000 Oe.

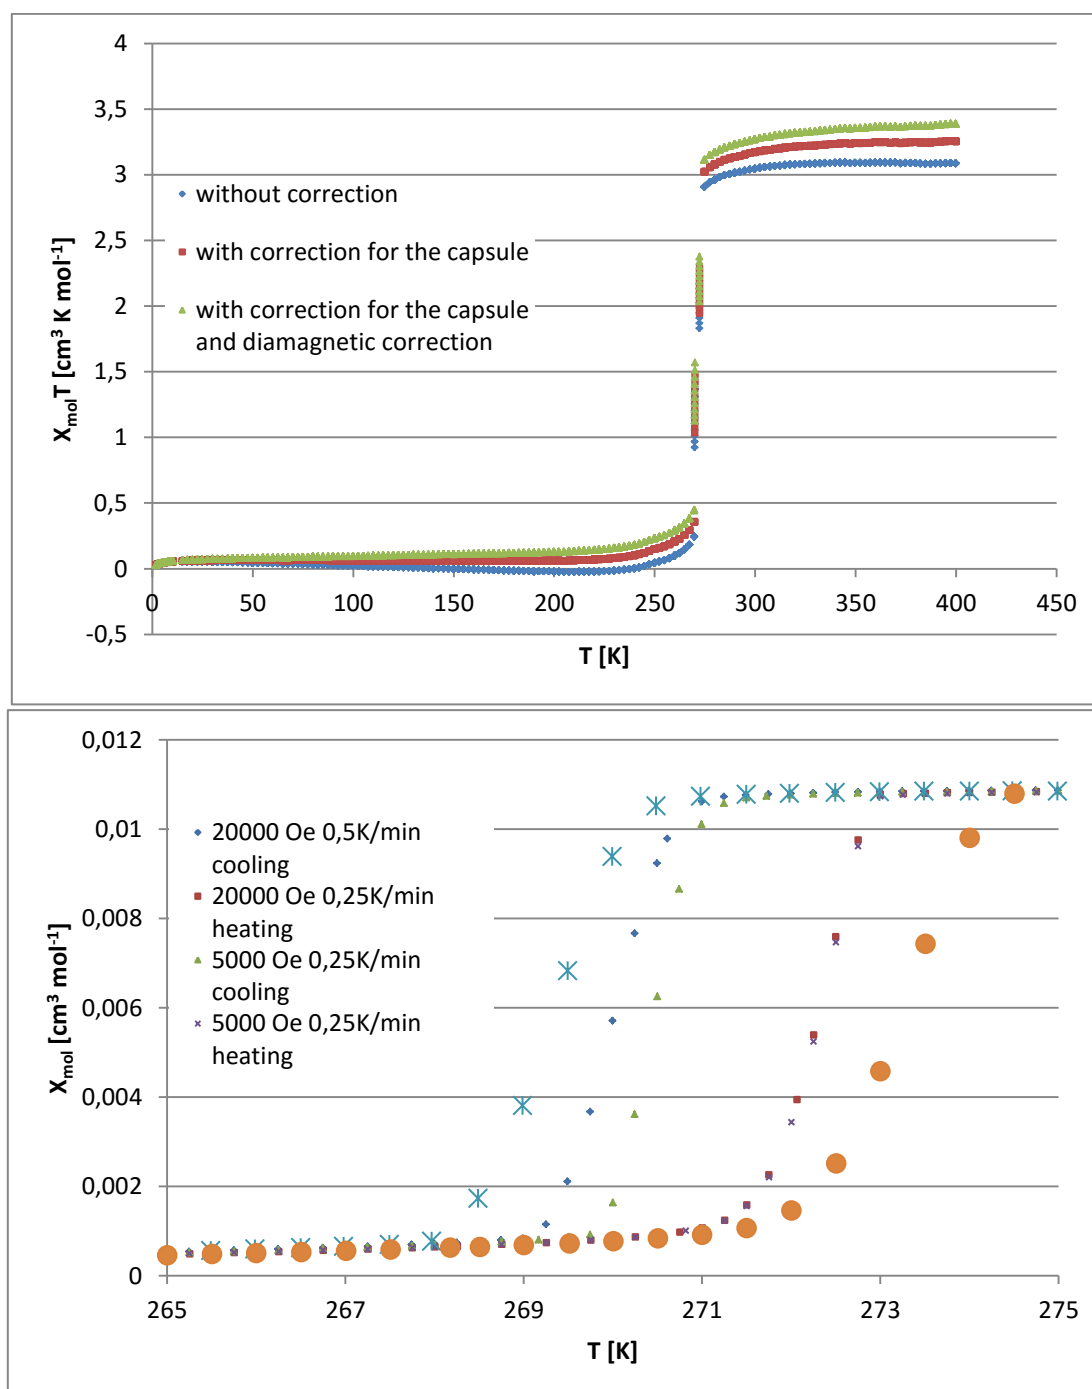

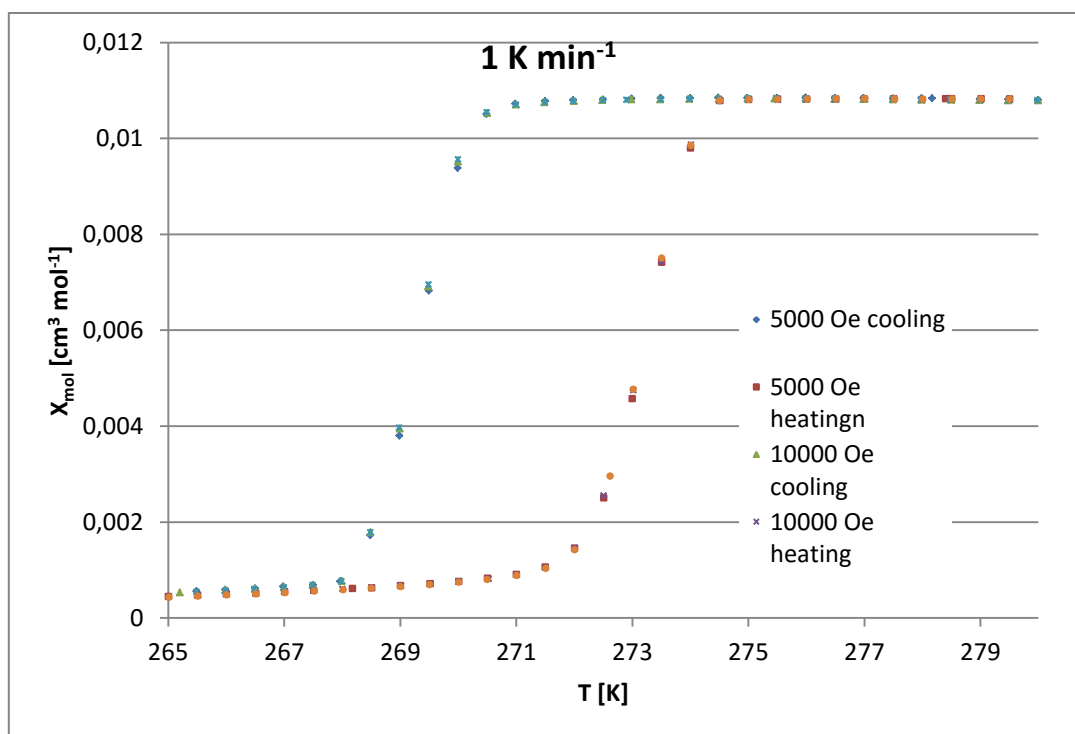

Magnetic data in solution were obtained by employing the Evans' method as described in literature<sup>[2]</sup> to the temperature dependent NMR-Data given above.

| C = 0.02M $\Delta$ tBuOH |       |                    |         | $\Delta$ MeCN |                    |         |                      |
|--------------------------|-------|--------------------|---------|---------------|--------------------|---------|----------------------|
| T                        | in Hz | $\mu_{\text{Eff}}$ | $X_m T$ | in Hz         | $\mu_{\text{Eff}}$ | $X_m T$ | $X_m T_{\text{avg}}$ |
| 340                      | 212,1 | 4,9101             | 2,9891  | 212,9000      | 4,9190             | 3,0000  | 2,9946               |
| 330                      | 205,3 | 4,7621             | 2,8117  | 205,3000      | 4,7621             | 2,8117  | 2,8117               |
| 320                      | 194,7 | 4,5715             | 2,5911  | 195,7000      | 4,5828             | 2,6039  | 2,5975               |
| 310                      | 179,6 | 4,3288             | 2,3233  | 180,6000      | 4,3404             | 2,3357  | 2,3295               |
| 300                      | 159,4 | 4,0229             | 2,0065  | 158,0000      | 4,0061             | 1,9898  | 1,9981               |
| 290                      | 143,5 | 3,7630             | 1,7556  | 145,0000      | 3,7816             | 1,7730  | 1,7643               |
| 280                      | 116   | 3,3456             | 1,3878  | 117,2000      | 3,3618             | 1,4012  | 1,3945               |
| 270                      | 91    | 2,9361             | 1,0688  | 93,6000       | 2,9744             | 1,0969  | 1,0828               |
| 260                      | 69    | 2,5417             | 0,8010  | 70,6000       | 2,5679             | 0,8176  | 0,8093               |
| 250                      | 50,1  | 2,1659             | 0,5816  | 51,1000       | 2,1844             | 0,5916  | 0,5866               |
| 240                      | 36,4  | 1,8561             | 0,4271  | 36,8000       | 1,8644             | 0,4310  | 0,4290               |

[2] D. F. Evans, *J. Chem. Soc.* **1959**, 2003.

## Crystal structure data

### Crystallographic data

|                            | <b>1[BF<sub>4</sub>]<sub>2</sub> (high-spin)</b>                                              | <b>1[BF<sub>4</sub>]<sub>2</sub> (low-spin)</b>                                               | <b>1[OTf]<sub>2</sub> (low-spin)</b>                                                          | <b>1[SbF<sub>6</sub>]<sub>6</sub> (low-spin)</b>                                                               |
|----------------------------|-----------------------------------------------------------------------------------------------|-----------------------------------------------------------------------------------------------|-----------------------------------------------------------------------------------------------|----------------------------------------------------------------------------------------------------------------|
| Molecular formula          | C <sub>18</sub> H <sub>21</sub> B <sub>2</sub> F <sub>8</sub> FeN <sub>7</sub> S <sub>3</sub> | C <sub>18</sub> H <sub>21</sub> B <sub>2</sub> F <sub>8</sub> FeN <sub>7</sub> S <sub>3</sub> | C <sub>18</sub> H <sub>21</sub> F <sub>6</sub> FeN <sub>7</sub> S <sub>5</sub> O <sub>6</sub> | C <sub>18</sub> H <sub>21</sub> B <sub>2</sub> F <sub>12</sub> FeN <sub>7</sub> S <sub>3</sub> Sb <sub>2</sub> |
| Crystal Class              | Monoclinic                                                                                    | Monoclinic                                                                                    | Orthorhombic                                                                                  | Hexagonal                                                                                                      |
| Space Group                | P2 <sub>1</sub> /c                                                                            | P2 <sub>1</sub> /c                                                                            | Pca2 <sub>1</sub>                                                                             | P6 <sub>5</sub>                                                                                                |
| a                          | 16.356(2)                                                                                     | 16.0951(5)                                                                                    | 19.6249(5)                                                                                    | 10.0709(9)                                                                                                     |
| b                          | 9.0081(10)                                                                                    | 8.8292(2)                                                                                     | 10.1650(3)                                                                                    | 10.0709(9)                                                                                                     |
| c                          | 17.826(2)                                                                                     | 17.4770(5)                                                                                    | 14.9187(4)                                                                                    | 49.888(4)                                                                                                      |
| β                          | 95.410(7)                                                                                     | 93.211(2)                                                                                     | 90                                                                                            |                                                                                                                |
| γ                          |                                                                                               |                                                                                               |                                                                                               | 120                                                                                                            |
| V (Å <sup>3</sup> )        | 2614.8(5)                                                                                     | 2479.90(12)                                                                                   | 2976.09(14)                                                                                   | 4381.9(9)                                                                                                      |
| Z                          | 4                                                                                             | 4                                                                                             | 4                                                                                             | 6                                                                                                              |
| T (K)                      | 296                                                                                           | 100                                                                                           | 100                                                                                           | 100                                                                                                            |
| Radiation                  | Mo-Kα (λ = 0.71073)                                                                           | Mo-Kα (λ = 0.71073)                                                                           | Cu-Kα (λ = 1.54178 Å)                                                                         | Mo-Kα (λ = 0.71073)                                                                                            |
| Measured reflections       | 71942                                                                                         | 93559                                                                                         | 40315                                                                                         | 42543                                                                                                          |
| Independent reflections    | 5122                                                                                          | 4859                                                                                          | 5313                                                                                          | 7013                                                                                                           |
| R <sub>int</sub>           | 0.0507                                                                                        | 0.0370                                                                                        | 0.0696                                                                                        | 0.00231                                                                                                        |
| R <sub>1</sub> (I ≥ 2σ(I)) | 0.0606                                                                                        | 0.0232                                                                                        | 0.0518                                                                                        | 0.0168                                                                                                         |
| wR <sub>2</sub> (all data) | 0.1701                                                                                        | 0.0573                                                                                        | 0.1436                                                                                        | 0.0382                                                                                                         |
| Goodness of fit            | 1.082                                                                                         | 1.058                                                                                         | 1.053                                                                                         | 1.192                                                                                                          |
| Flack parameter            |                                                                                               |                                                                                               | 0.006(6)                                                                                      |                                                                                                                |
| CCDC No.                   | 1496473                                                                                       | 1496474                                                                                       | 1496475                                                                                       | 1496476                                                                                                        |

Clear reddish-brown plates of **1[BF<sub>4</sub>]<sub>2</sub>** were obtained when the compound was crystallised from acetonitrile using *tert*-butyl methyl ether as antisolvent.

Clear black plank-like specimens of **1[OTf]<sub>2</sub>** were obtained when the compound was crystallised from acetonitrile using diethyl ether as antisolvent.

Clear yellow plates of **1[SbF<sub>6</sub>]<sub>2</sub>** were obtained when the compound was crystallised from acetonitrile using diethyl ether as antisolvent.

The data collections for **1[BF<sub>4</sub>]<sub>2</sub> (high-spin)**, **1[BF<sub>4</sub>]<sub>2</sub> (low-spin)** were performed on a Bruker Kappa ApexII diffractometer, the data collection of **1[SbF<sub>6</sub>]<sub>6</sub> (low-spin)** was performed on a Bruker D8-Venture diffractometer. Mo-Kα irradiation (λ = 0.71073 Å) was used for the three samples. The diffractometer were equipped with a low-temperature device (Bruker Kryoflex I, Bruker AXS or Oxford Cryostream 800er series, Oxford Cryosystems). The data collection for **1[OTf]<sub>2</sub> (low-spin)** was performed on a Bruker D8-Venture diffractometer (area detector) using Cu-Kα irradiation (λ = 1.54178 Å). The diffractometer was equipped with a low-temperature device (Oxford Cryostream 800er series, Oxford Cryosystems).

Intensities were measured by fine-slicing ω and φ-scans and corrected for background, polarization and Lorentz effects. A semi-empirical absorption correction was applied for all data sets, except for that of **1[OTf]<sub>2</sub>** where a numerical absorption correction from face indices has been applied. The structures were solved by direct methods and refined anisotropically by the least-square procedure implemented in the SHELX program system.<sup>[3]</sup> Hydrogen atoms were included using the riding model on the bound carbon atoms.

[3]G. M. Sheldrick, *SHELXS97* and *SHELXL97*, University of Göttingen, Germany, **1997**.

CCDC numbers CCDC-1496473-1496476 contain the supplementary crystallographic data for this paper, which can be obtained free of charge from the Cambridge Crystallographic Data Centre via [www.ccdc.cam.ac.uk/data\\_request/cif](http://www.ccdc.cam.ac.uk/data_request/cif).

## Crystallographic data

### $1[\text{BF}_4]_2$

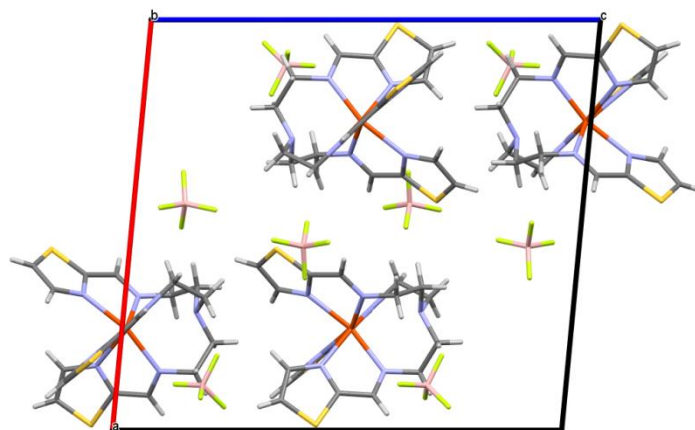

Unit cell of  $1[\text{BF}_4]_4$  (high-spin) at 293 K. View along  $[010]$ .

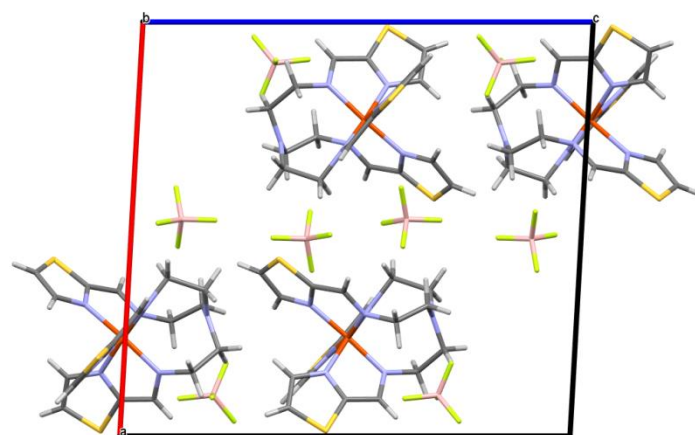

Unit cell of  $1[\text{BF}_4]_2$  (low-spin) at 100 K. View along  $[010]$ .

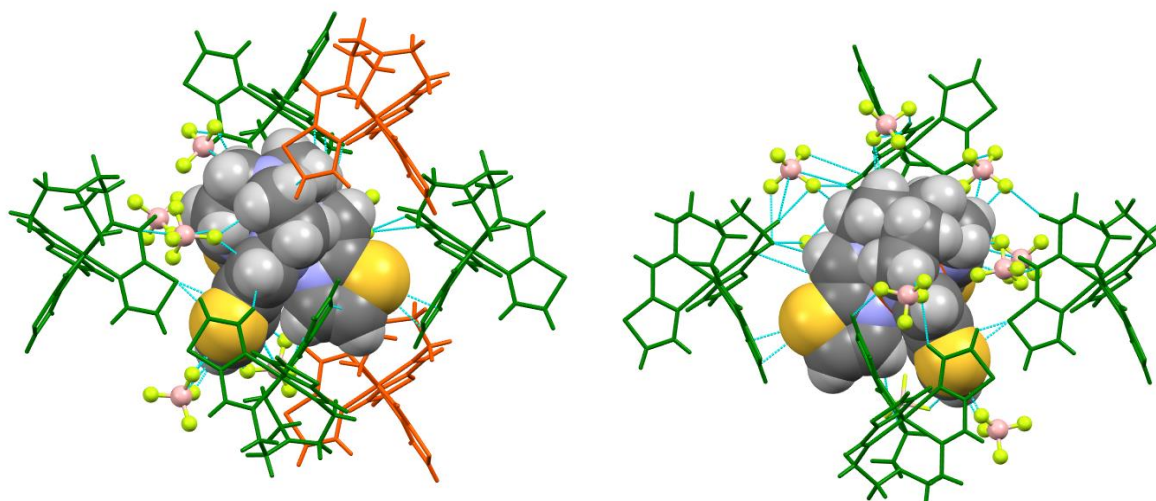

Comparison of the secondary coordination sphere in  $1[\text{BF}_4]_2$  (left LS, 100 K, right HS, 293 K). Central cationic unit in space filling model, always connected cationic units green, contacts present only in the LS-state orange.

### $1[\text{OTf}]_2$

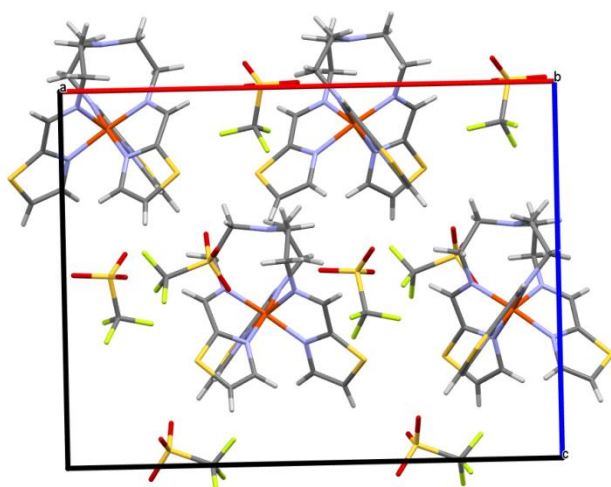

Unit cell of  $1[\text{OTf}]_2$  (low-spin) at 100 K. View along [010].

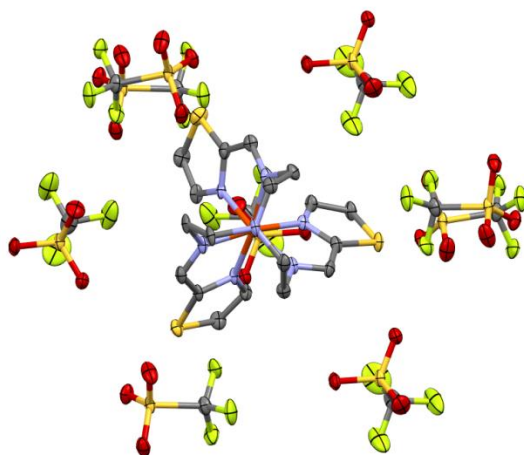

Secondary coordination sphere in  $1[\text{OTf}]_2$  (low-spin) at 100 K. View along  $[001]$ .

### $1[\text{SbF}_6]_2$

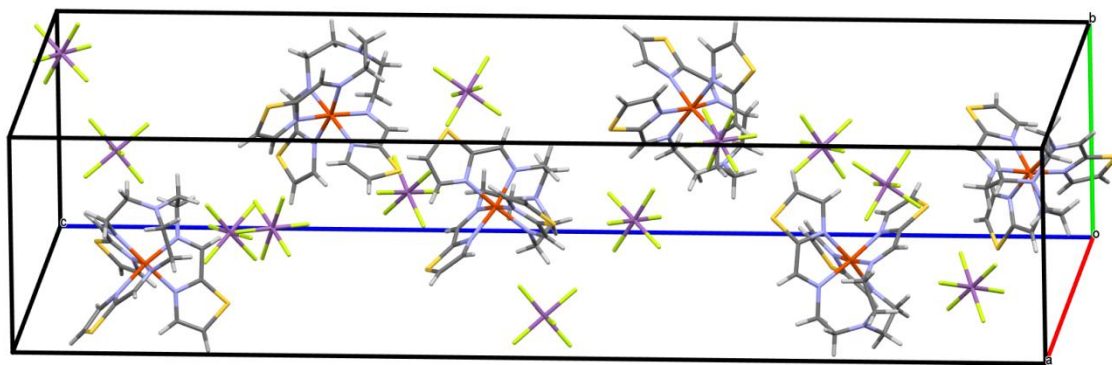

Unit cell of  $1[\text{SbF}_6]_2$  (low-spin) at 100 K. Arbitrary view.

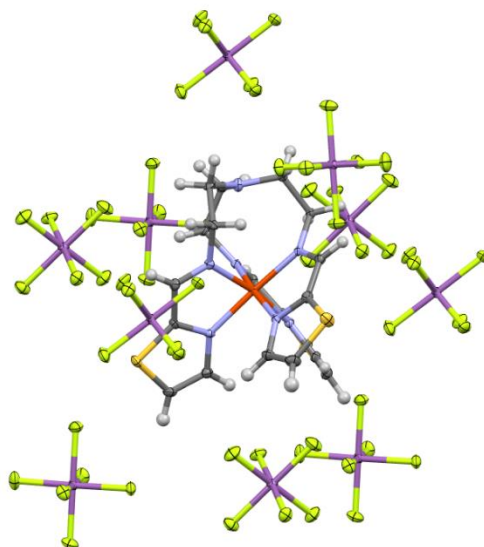

Secondary coordination sphere in **1**[SbF<sub>6</sub>]<sub>2</sub> (low-spin) at 100 K. View along [111].

### Analysis of coordination polyhedra via *Continuous Symmetry Measure (CSM)* and *Continuous Shape Measure (CShM)*

The coordination sphere of the complexes as revealed by XRD analysis were evaluated by employing the Continuous Symmetry Measure (CSM) and Continuous Shape Measure (CShM) programme developed by D. Avnir (<http://www.csm.huji.as.il>).

The SHAPE measure evaluates the degree of polyhedricity in distorted polyhedra. Perfect polyhedra are highly symmetric, and therefore in its application here, Shape is also a symmetry measure. The library of reference polyhedral shapes is large and includes the tetrahedron, octahedron, trigonal bipyramid, trigonal prism, and many more. The value of this measure ranges from zero - the molecule has the investigated polyhedral shape - to higher values (the upper limit is 100); the higher the shape-measure value, the farther is the structure from the reference shape.

|                                                    | octahedron | trigonal prism |
|----------------------------------------------------|------------|----------------|
| <b>1</b> [BF <sub>4</sub> ] <sub>2</sub> at 100 K  | 46.27      | 49.76          |
| <b>1</b> [BF <sub>4</sub> ] <sub>2</sub> at 293 K  | 45.28*     |                |
| <b>1</b> [OTf] <sub>2</sub> at 100 K               | 43.18      | 47-12          |
| <b>1</b> [SbF <sub>6</sub> ] <sub>2</sub> at 100 K | 0.661      | ---            |

\*the coordination polyhedron of **1**[BF<sub>4</sub>]<sub>2</sub> in its high-spin form can best be described as a monocapped octahedron with six shorter Fe-N bonds and an elongated seventh bond.

### Powder XRD data

X-Ray powder diffractograms were recorded at room temperature using Co-K $\alpha_1$  radiation and were baseline corrected. The experimental diffractograms were compared to the respective calculated diffraction patterns obtained from singly crystal XRD-data.

### $1[\text{BF}_4]_2$

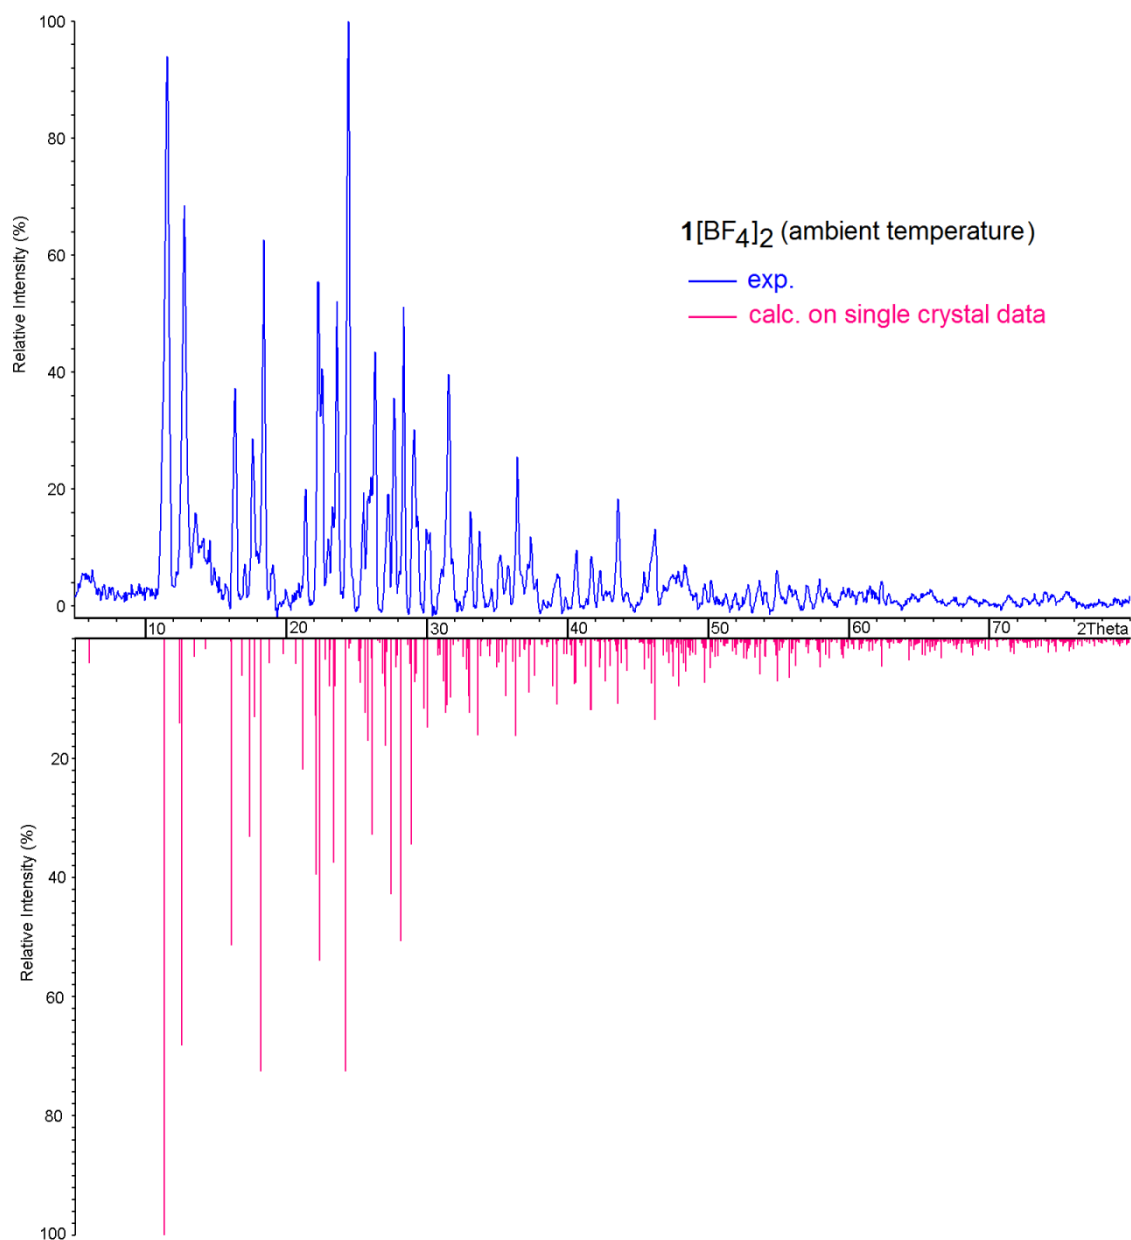

X-ray powder diffractogram of  $1[\text{BF}_4]_2$ , recorded at ambient temperature using Co-K $\alpha_1$  radiation. The experimental diffractogram (blue) is baseline corrected. The calculated diffraction pattern (violet) is shown as a line diagram.

## $1[\text{OTf}]_2$

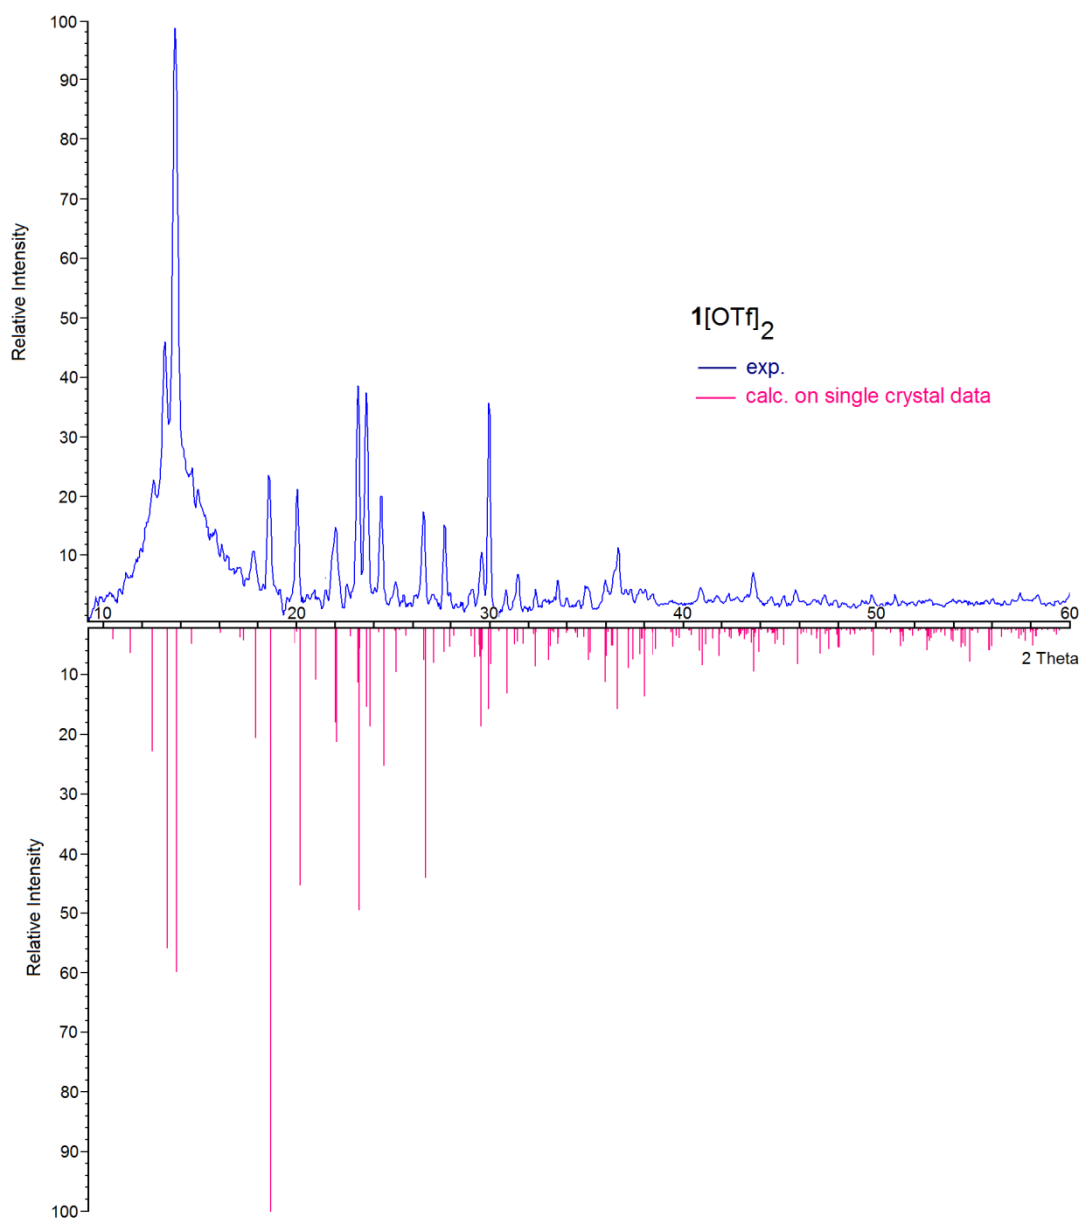

X-ray powder diffractogram of  $1[\text{OTf}]_2$ , recorded at ambient temperature using  $\text{Co-K}\alpha_1$  radiation. The experimental diffractogram (blue) is baseline corrected. The calculated diffraction pattern (violet) is shown as a line diagram.

## $1[\text{SbF}_6]_2$

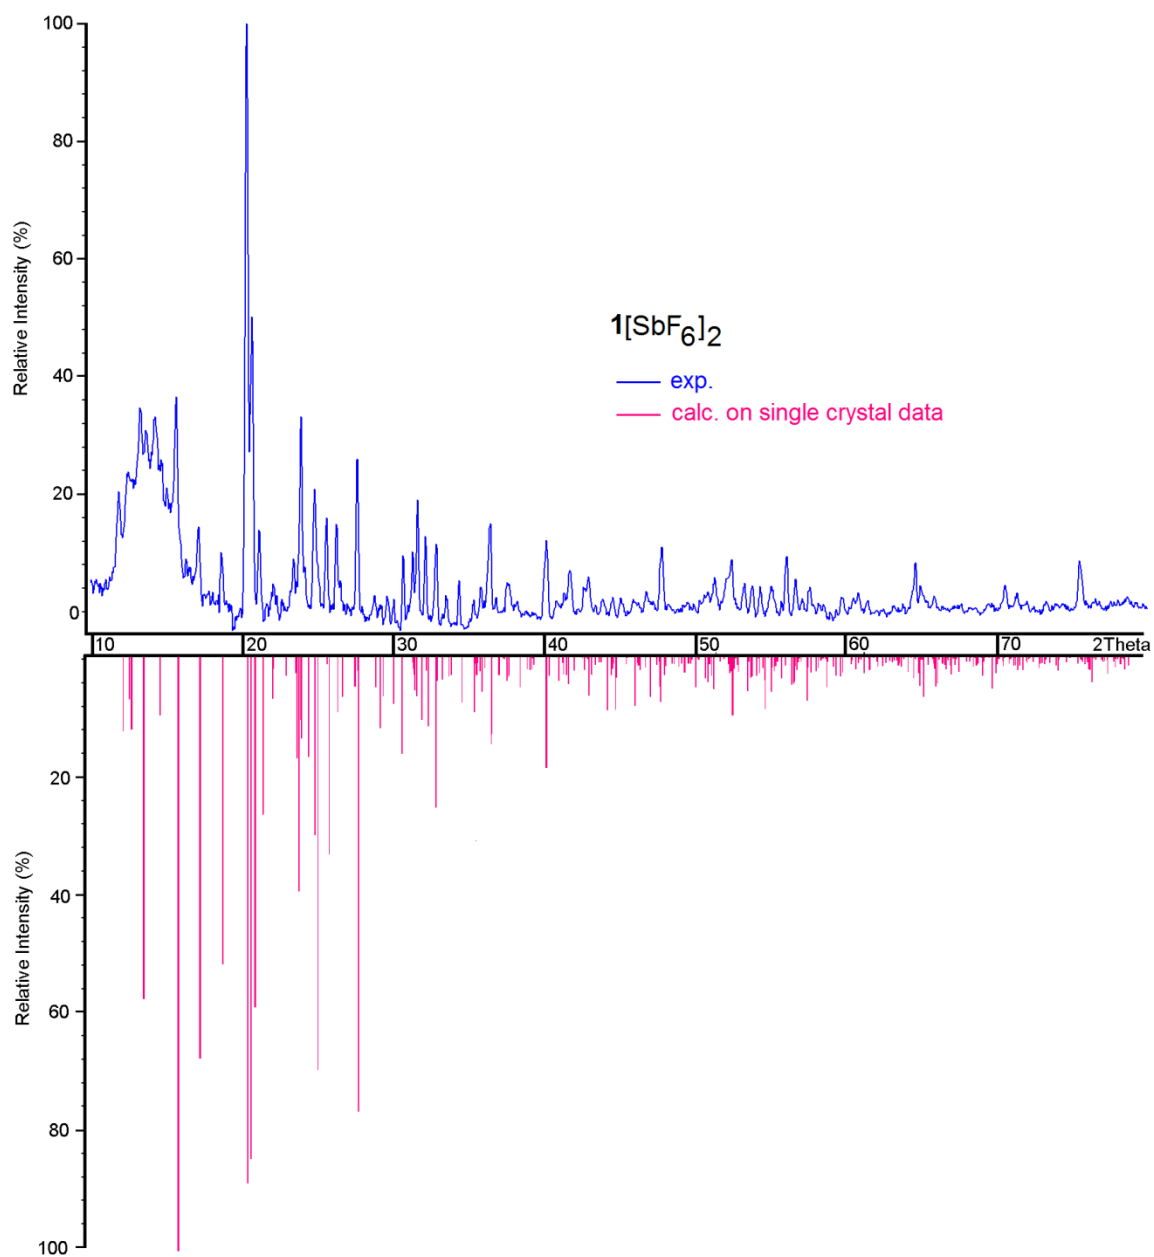

X-ray powder diffractogram of  $1[\text{SbF}_6]_2$ , recorded at ambient temperature using  $\text{Co-K}\alpha_1$  radiation. The experimental diffractogram (blue) is baseline corrected. The calculated diffraction pattern (violet) is shown as a line diagram.
